# Supplementary material for: Ring-forming transformation associated with hydrazone changes of hexadecanuclear dysprosium phosphonates
Source: Royal Society of Chemistry journal article supplement (doi:10.1039/d0dt03536j), 2020-12-12
Supplement: d0dt03536j1.pdf [file d0dt03536j1.pdf]

## Supporting Information

### **Ringing the transformation associated with hydrazone changes of hexadecanuclear dysprosium phosphonates**

Haiquan Tian,<sup>\*a</sup> Fu-Ping Huang,<sup>b</sup> Yongfei Li,<sup>a</sup> Peiqiong Chen,<sup>a</sup> Keyu Chai,<sup>a</sup> Jing Lu,<sup>a</sup> Hou-Ting Liu,<sup>a</sup> Suyuan Zeng,<sup>a</sup> Dacheng Li<sup>a</sup> and Jianmin Dou<sup>a</sup>

<sup>a</sup>Shandong Provincial Key Laboratory of Chemical Energy Storage and Novel Cell Technology, School of Chemistry and Chemical Engineering, Liaocheng University, Liaocheng 252059, P. R. China. E-mail: [tianhaiquan@lcu.edu.cn](mailto:tianhaiquan@lcu.edu.cn)

<sup>b</sup>Key Laboratory for the Chemistry and Molecular Engineering of Medicinal Resources (Ministry of Education of China), School of Chemistry and Pharmacy, Guangxi Normal University, Guilin, 541004, P. R. China.

**Table S1** Selected bond lengths (Å) and angles (°) for **1**.

| Complex 1 |           |          |          |              |          |
|-----------|-----------|----------|----------|--------------|----------|
| Dy1–O1    | 2.496(5)  | Dy4–O19  | 2.402(5) | Dy8–O28a     | 2.562(5) |
| Dy1–O2    | 2.675(6)  | Dy4–N6   | 2.476(6) | Dy8–N4       | 2.534(6) |
| Dy1–O22   | 2.260(5)  | Dy5–O10  | 2.352(5) | Dy1···Dy2    | 3.780(9) |
| Dy1–O29   | 2.370(6)  | Dy5–O16  | 2.259(6) | Dy1···Dy3    | 3.951(5) |
| Dy1–O30   | 2.378(6)  | Dy5–O18  | 2.438(6) | Dy1···Dy7    | 4.053(6) |
| Dy1–O31   | 2.182(8)  | Dy5–O23  | 2.281(5) | Dy2···Dy3    | 3.943(6) |
| Dy1–O32   | 2.294(7)  | Dy5–O7a  | 2.375(6) | Dy2···Dy8    | 4.055(6) |
| Dy1–N16   | 2.502(8)  | Dy5–O12a | 2.446(5) | Dy4···Dy5    | 4.385(5) |
| Dy2–O1    | 2.489(6)  | Dy5–O14a | 2.549(5) | Dy4···Dy6    | 4.029(5) |
| Dy2–O3    | 2.577(5)  | Dy6–O12  | 2.351(5) | Dy5···Dy6    | 3.983(8) |
| Dy2–O25   | 2.444(6)  | Dy6–O17  | 2.413(6) | Dy5···Dy7    | 3.888(2) |
| Dy2–O26   | 2.350(6)  | Dy6–O19  | 2.414(5) | Dy6···Dy8    | 4.037(6) |
| Dy2–O29   | 2.355(4)  | Dy6–O20  | 2.195(6) | Dy7···Dy8    | 3.906(3) |
| Dy2–O33   | 2.338(8)  | Dy6–O28  | 2.287(5) | Dy4···Dy6a   | 5.820(3) |
| Dy2–O34   | 2.501(7)  | Dy6–O10a | 2.431(5) | Dy5···Dy6a   | 3.983(2) |
| Dy2–O2w   | 2.418(7)  | Dy6–O11a | 2.589(5) | Dy4···Dy4a   | 6.251(6) |
| Dy2–N14   | 2.627(9)  | Dy6–N8   | 2.510(6) | Dy1–O1–Dy2   | 98.6(2)  |
| Dy3–O21   | 2.375(5)  | Dy7–O2   | 2.291(5) | Dy1–O2–Dy7   | 107.3(2) |
| Dy3–O24   | 2.230(5)  | Dy7–O4   | 2.363(6) | Dy1–O29–Dy2  | 106.2(2) |
| Dy3–O25   | 2.359(6)  | Dy7–O6   | 2.373(6) | Dy1–O29–Dy3  | 112.3(2) |
| Dy3–O27   | 2.293(7)  | Dy7–O8   | 2.284(5) | Dy2–O29–Dy3  | 112.5(2) |
| Dy3–O29   | 2.388(5)  | Dy7–O14  | 2.261(5) | Dy1–O30–Dy3  | 113.0(2) |
| Dy3–O30   | 2.362(7)  | Dy7–O22a | 2.485(5) | Dy2–O3–Dy8   | 110.4(2) |
| Dy3–N10   | 2.645(13) | Dy7–O23a | 2.532(5) | Dy4–O18–Dy5  | 124.7(2) |
| Dy3–N11   | 2.543(8)  | Dy7–N2   | 2.561(9) | Dy4–O19–Dy6  | 113.6(2) |
| Dy4–O1w   | 2.340(5)  | Dy8–O3   | 2.359(5) | Dy5–O12–Dy6  | 112.3(2) |
| Dy4–O9    | 2.203(7)  | Dy8–O4   | 2.374(6) | Dy5–O10–Dy6a | 112.8(2) |
| Dy4–O13   | 2.429(5)  | Dy8–O5   | 2.261(6) | Dy5–O14–Dy7a | 107.7(2) |
| Dy4–O15   | 2.314(6)  | Dy8–O8   | 2.333(6) | Dy6–O11–Dy8a | 111.2(1) |
| Dy4–O17   | 2.419(5)  | Dy8–O11  | 2.302(5) | Dy7–O4–Dy8   | 111.1(2) |
| Dy4–O18   | 2.512(5)  | Dy8–O26a | 2.509(6) | Dy7–O8–Dy8   | 115.6(2) |

Symmetry code: a: 1-x, 1-y, 1-z.

**Table S2** Selected bond lengths (Å) and angles (°) for **2**.

| Complex 2 |           |           |           |             |           |
|-----------|-----------|-----------|-----------|-------------|-----------|
| Dy1–O2    | 2.233(19) | Dy3–O19   | 2.369(19) | Dy2···Dy4   | 5.171(2)  |
| Dy1–O6    | 2.222(19) | Dy3–O20   | 2.231(19) | Dy3···Dy4   | 5.449(2)  |
| Dy1–O7    | 2.258(58) | Dy3–O22   | 2.360(20) | Dy4···Dy4a  | 5.912(7)  |
| Dy1–O10   | 2.213(19) | Dy3–N3    | 2.530(30) | Dy4···Dy4b  | 8.360(5)  |
| Dy1–O18   | 2.364(19) | Dy3–O3a   | 2.220(19) | Dy1···Dy1a  | 9.975(2)  |
| Dy1–O24   | 2.330(20) | Dy4–O5    | 2.267(19) | Dy1···Dy1b  | 13.437(3) |
| Dy2–O9    | 2.209(19) | Dy4–O8    | 2.200(19) | Dy2···Dy2a  | 12.672(8) |
| Dy2–O12   | 2.240(20) | Dy4–O16   | 2.238(16) | Dy2···Dy2b  | 17.899(5) |
| Dy2–O13   | 2.260(20) | Dy4–O23   | 2.415(19) | Dy3···Dy3a  | 13.622(2) |
| Dy2–O17   | 2.399(17) | Dy4–O1a   | 2.226(19) | Dy3···Dy3b  | 18.952(8) |
| Dy2–O18   | 2.438(19) | Dy4–O4a   | 2.202(16) | Dy1–O18–Dy2 | 122.0(8)  |
| Dy2–O19   | 2.322(19) | Dy1···Dy2 | 4.200(4)  | Dy2–O17–Dy3 | 107.7(7)  |
| Dy2–N1    | 2.540(30) | Dy1···Dy3 | 4.906(8)  | Dy2–O19–Dy3 | 111.6(7)  |
| Dy3–O14   | 2.284(19) | Dy1···Dy3 | 7.101(2)  |             |           |
| Dy3–O17   | 2.407(16) | Dy2···Dy3 | 3.879(7)  |             |           |

Symmetry code: a: 0.5-x, 0.5-y, z; b: y, 0.5-x, 1.5-z.

**Table S3** Dy<sup>III</sup> geometry analysis of **1** and **2** by SHAPE 2.1 software.

| <b>Complex 1</b>         |                                               |                          |                                                     |                          |                                                               |              |                                                  |              |                                                       |            |
|--------------------------|-----------------------------------------------|--------------------------|-----------------------------------------------------|--------------------------|---------------------------------------------------------------|--------------|--------------------------------------------------|--------------|-------------------------------------------------------|------------|
| <b>Geometry (CN = 7)</b> | <b>Dy5</b>                                    | <b>Geometry (CN = 8)</b> | <b>Dy1</b>                                          | <b>Dy3</b>               | <b>Dy4</b>                                                    | <b>Dy6</b>   | <b>Dy7</b>                                       | <b>Dy8</b>   | <b>Geometry (CN = 9)</b>                              | <b>Dy2</b> |
| <b>CTPR-7</b>            | 3.462                                         | <b>JBTPR-8</b>           | 2.071                                               | 27.865                   | 4.237                                                         | 3.417        | 25.910                                           | 26.349       | <b>JCSAPR-9</b>                                       | 22.535     |
| <b>PBPY-7</b>            | 4.004                                         | <b>BTPR-8</b>            | 2.474                                               | 25.515                   | 3.189                                                         | 3.168        | 26.311                                           | 28.000       | <b>JTCTPR-9</b>                                       | 22.565     |
| <b>COC-7</b>             | 5.735                                         | <b>JSD-8</b>             | 2.965                                               | 29.383                   | 5.135                                                         | 3.134        | 26.728                                           | 27.460       | <b>CSAPR-9</b>                                        | 22.819     |
| <b>JPBPY-7</b>           | 7.180                                         | <b>TDD-8</b>             | 3.460                                               | 25.614                   | 2.060                                                         | 3.486        | 26.608                                           | 27.399       | <b>TCTPR-9</b>                                        | 22.994     |
| <b>HPY-7</b>             | 17.965                                        | <b>SAPR-8</b>            | 3.644                                               | 27.519                   | 4.574                                                         | 4.685        | 26.664                                           | 28.893       | <b>MFF-9</b>                                          | 23.063     |
| <b>JETPY-7</b>           | 18.427                                        | <b>JGBF-8</b>            | 8.690                                               | 27.350                   | 12.653                                                        | 9.037        | 31.380                                           | 32.964       | <b>JTC-9</b>                                          | 26.971     |
| <b>HP-7</b>              | 26.805                                        | <b>CU-8</b>              | 9.422                                               | 31.963                   | 7.576                                                         | 9.156        | 31.317                                           | 32.354       | <b>HH-9</b>                                           | 27.863     |
|                          |                                               | <b>TT-8</b>              | 9.872                                               | 31.201                   | 8.154                                                         | 9.963        | 29.814                                           | 30.662       | <b>CCU-9</b>                                          | 28.000     |
|                          |                                               | <b>HBPY-8</b>            | 11.510                                              | 31.987                   | 11.578                                                        | 11.028       | 31.312                                           | 30.274       | <b>JCCU-9</b>                                         | 28.046     |
|                          |                                               | <b>ETBPY-8</b>           | 20.871                                              | 39.036                   | 23.359                                                        | 21.272       | 39.473                                           | 39.626       | <b>JTDIC-9</b>                                        | 29.310     |
|                          |                                               | <b>JETBPY-8</b>          | 23.616                                              | 40.257                   | 26.583                                                        | 23.318       | 42.393                                           | 43.318       | <b>HBPY-9</b>                                         | 34.395     |
|                          |                                               | <b>HPY-8</b>             | 24.322                                              | 35.727                   | 22.955                                                        | 24.626       | 37.838                                           | 38.770       | <b>OPY-9</b>                                          | 36.599     |
|                          |                                               | <b>OP-8</b>              | 29.969                                              | 47.533                   | 35.234                                                        | 32.260       | 47.328                                           | 48.711       | <b>EP-9</b>                                           | 45.789     |
| <b>Complex 2</b>         |                                               |                          |                                                     |                          |                                                               |              |                                                  |              |                                                       |            |
| <b>Geometry (CN = 6)</b> |                                               | <b>Dy1</b>               | <b>Dy4</b>                                          | <b>Geometry (CN = 7)</b> |                                                               |              | <b>Dy2</b>                                       | <b>Dy3</b>   |                                                       |            |
| <b>HP-6</b>              |                                               | 50.552                   | 49.337                                              | <b>HP-7</b>              |                                                               |              | 42.993                                           | 44.176       |                                                       |            |
| <b>PPY-6</b>             |                                               | 33.841                   | 33.439                                              | <b>HPY-7</b>             |                                                               |              | 27.907                                           | 28.449       |                                                       |            |
| <b>OC-6</b>              |                                               | 30.303                   | 29.961                                              | <b>PBPY-7</b>            |                                                               |              | 27.496                                           | 25.863       |                                                       |            |
| <b>TPR-6</b>             |                                               | 39.456                   | 39.673                                              | <b>COC-7</b>             |                                                               |              | 28.911                                           | 30.255       |                                                       |            |
| <b>JPPY-6</b>            |                                               | 38.499                   | 37.721                                              | <b>CTPR-7</b>            |                                                               |              | 27.415                                           | 29.162       |                                                       |            |
|                          |                                               |                          |                                                     | <b>JPBPY-7</b>           |                                                               |              | 22.403                                           | 20.724       |                                                       |            |
|                          |                                               |                          |                                                     | <b>JETPY-7</b>           |                                                               |              | 35.013                                           | 38.132       |                                                       |            |
| <b>Lable</b>             | <b>Shape</b>                                  | <b>Lable</b>             | <b>Shape</b>                                        | <b>Lable</b>             | <b>Shape</b>                                                  | <b>Lable</b> | <b>Shape</b>                                     | <b>Lable</b> | <b>Shape</b>                                          |            |
| HP-6                     | Hexagon (D <sub>6h</sub> )                    | COC-7                    | Capped octahedron (C <sub>3v</sub> )                | SAPR-8                   | Square antiprism (D <sub>4d</sub> )                           | ETBPY-8      | Elongated trigonal bipyramid (D <sub>3h</sub> )  | CSAPR-9      | Spherical capped square antiprism (C <sub>4v</sub> )  |            |
| PPY-6                    | Pentagonal pyramid (C <sub>5v</sub> )         | CTPR-7                   | Capped trigonal prism (C <sub>2v</sub> )            | TDD-8                    | Triangular dodecahedron (D <sub>2d</sub> )                    | EP-9         | Enneagon (D <sub>9h</sub> )                      | JTCTPR-9     | Tricapped trigonal prism J51 (D <sub>3h</sub> )       |            |
| OC-6                     | Octahedron (O <sub>h</sub> )                  | JPBPY-7                  | Johnson pentagonal bipyramid J13 (D <sub>3h</sub> ) | JGBF-8                   | Johnson gyrobifastigium J26 (D <sub>2d</sub> )                | OPY-9        | Octagonal pyramid (C <sub>8v</sub> )             | TCTPR-9      | Spherical tricapped trigonal prism (D <sub>3h</sub> ) |            |
| TPR-6                    | Trigonal prism (D <sub>3h</sub> )             | JETPY-7                  | Elongated triangular pyramid J7 (C <sub>3v</sub> )  | JETBPY-8                 | Johnson elongated triangular bipyramid J14 (D <sub>3h</sub> ) | HBPY-9       | Heptagonal bipyramid (D <sub>7h</sub> )          | JTDIC-9      | Tridiminished icosahedron J63 (C <sub>3v</sub> )      |            |
| JPPY-5                   | Johnson pentagonal pyramid (C <sub>5v</sub> ) | OP-8                     | Octagon                                             | JBTPR-8                  | Biaugmented trigonal prism J50 (C <sub>2v</sub> )             | JTC-9        | Johnson triangular cupola J3 (C <sub>3v</sub> )  | HH-9         | Hula-hoop (C <sub>2v</sub> )                          |            |
| HP-7                     | Heptagon                                      | HPY-8                    | Heptagonal pyramid (C <sub>7v</sub> )               | BTPR-8                   | Biaugmented trigonal prism (C <sub>2v</sub> )                 | JCCU-9       | Capped cube J8 (C <sub>4v</sub> )                | MFF-9        | Muffin (C <sub>s</sub> )                              |            |
| HPY-7                    | Hexagonal pyramid (C <sub>6v</sub> )          | HBPY-8                   | Hexagonal bipyramid (D <sub>6h</sub> )              | JSD-8                    | Snub diphenoid J84 (D <sub>2d</sub> )                         | CCU-9        | Spherical-relaxed capped cube (C <sub>4v</sub> ) |              |                                                       |            |
| PBPY-7                   | Pentagonal bipyramid (D <sub>5h</sub> )       | CU-8                     | Cube (O <sub>h</sub> )                              | TT-8                     | Triakis tetrahedron (T <sub>d</sub> )                         | JCSAPR-9     | Capped square antiprism J10 (C <sub>4v</sub> )   |              |                                                       |            |

**Table S4** Relaxation fitting parameters from least-squares fitting of  $\chi(\omega)$  data under zero  $dc$  field for **1**.

| $T$ | $\chi_{\tau}$ | $\chi_s$ | $\alpha$ | $\ln(\tau / \text{s})$ |
|-----|---------------|----------|----------|------------------------|
| 1.8 | 95.58         | 54.42    | 0.289    | -9.190                 |
| 2.0 | 82.23         | 48.77    | 0.281    | -9.073                 |
| 2.3 | 70.05         | 40.95    | 0.240    | -9.074                 |
| 2.6 | 59.07         | 32.93    | 0.215    | -9.138                 |
| 2.9 | 49.26         | 25.74    | 0.195    | -9.193                 |
| 3.2 | 39.72         | 18.28    | 0.184    | -9.270                 |
| 3.5 | 30.41         | 10.59    | 0.177    | -9.363                 |
| 3.7 | 22.04         | 3.96     | 0.171    | -9.433                 |
| 4.0 | 15.36         | -1.36    | 0.170    | -9.528                 |
| 4.5 | 10.00         | -4.00    | 0.165    | -9.646                 |
| 5.0 | 4.34          | -7.34    | 0.167    | -9.778                 |
| 5.5 | -0.44         | -10.56   | 0.179    | -9.980                 |
| 6.0 | -2.15         | -10.85   | 0.193    | -10.196                |
| 6.5 | -4.33         | -11.67   | 0.207    | -10.397                |
| 7.0 | -6.20         | -12.80   | 0.238    | -10.746                |
| 7.5 | -7.78         | -15.22   | 0.285    | -11.521                |
| 8.0 | -8.94         | -16.06   | 0.319    | -12.055                |

**Table S5** Relaxation fitting parameters from least-squares fitting of  $\chi(\omega)$  data under 1.0 kOe *dc* field for **1**.

| $T$  | $\chi_r$ | $\chi_s$ | $\alpha$ | $\ln(\tau / \text{s})$ |
|------|----------|----------|----------|------------------------|
| 1.8  | 99.96    | 44.04    | 0.309    | -7.767                 |
| 2.0  | 79.00    | 34.00    | 0.294    | -7.763                 |
| 2.3  | 66.79    | 30.21    | 0.283    | -7.775                 |
| 2.6  | 53.82    | 22.18    | 0.250    | -7.813                 |
| 2.9  | 41.51    | 13.49    | 0.230    | -7.85                  |
| 3.2  | 31.18    | 5.82     | 0.219    | -7.896                 |
| 3.5  | 22.92    | 0.08     | 0.205    | -7.926                 |
| 3.7  | 15.76    | -4.76    | 0.190    | -7.951                 |
| 4.0  | 10.81    | -7.81    | 0.180    | -7.987                 |
| 4.5  | 6.26     | -9.26    | 0.161    | -8.028                 |
| 5.0  | 2.43     | -10.43   | 0.141    | -8.072                 |
| 5.5  | 0.39     | -10.39   | 0.130    | -8.149                 |
| 6.0  | -1.55    | -10.45   | 0.117    | -8.219                 |
| 6.5  | -3.34    | -10.66   | 0.107    | -8.294                 |
| 7.0  | -5.11    | -10.89   | 0.087    | -8.552                 |
| 7.5  | -6.14    | -10.86   | 0.084    | -8.893                 |
| 8.0  | -7.10    | -10.90   | 0.079    | -9.253                 |
| 8.5  | -8.09    | -10.90   | 0.055    | -9.792                 |
| 9.0  | -8.90    | -11.10   | 0.060    | -10.336                |
| 9.5  | -9.66    | -11.34   | 0.057    | -10.868                |
| 10.0 | -10.38   | -11.62   | 0.044    | -11.292                |
| 10.5 | -11.07   | -11.93   | 0.018    | -11.629                |

**Table S6** Relaxation fitting parameters from least-squares fitting of  $\chi(\omega)$  data under zero  $dc$  field for **2**.

| $T$ | $\chi_{\tau}$ | $\chi_s$ | $\alpha$ | $\ln(\tau / \text{s})$ |
|-----|---------------|----------|----------|------------------------|
| 1.8 | 78.95         | 61.05    | 0.481    | -9.366                 |
| 2.0 | 75.35         | 59.65    | 0.485    | -9.401                 |
| 2.3 | 71.62         | 56.37    | 0.510    | -9.426                 |
| 2.6 | 68.55         | 55.45    | 0.516    | -9.470                 |
| 2.9 | 63.83         | 51.17    | 0.522    | -9.608                 |
| 3.2 | 61.59         | 48.41    | 0.526    | -9.735                 |
| 3.5 | 59.06         | 46.94    | 0.525    | -9.820                 |
| 3.7 | 56.72         | 45.28    | 0.531    | -9.902                 |
| 4.0 | 54.89         | 44.11    | 0.530    | -10.054                |
| 4.5 | 52.86         | 43.14    | 0.536    | -10.306                |
| 5.0 | 50.71         | 41.29    | 0.551    | -10.624                |
| 5.5 | 49.64         | 39.36    | 0.590    | -11.063                |
| 6.0 | 49.19         | 36.81    | 0.620    | -11.667                |
| 6.5 | 47.48         | 35.52    | 0.624    | -12.277                |
| 7.0 | 44.28         | 33.72    | 0.599    | -12.617                |
| 7.5 | 47.03         | 27.97    | 0.627    | -12.964                |
| 8.0 | 38.57         | 26.43    | 0.592    | -13.208                |

**Table S7** Relaxation fitting parameters from least-squares fitting of  $\chi(\omega)$  data under 1.0 kOe *dc* field for **2**.

| <i>T</i> | $\chi_r$ | $\chi_s$ | $\alpha$ | $\ln(\tau / \text{s})$ |
|----------|----------|----------|----------|------------------------|
| 1.8      | 33.82    | 16.18    | 0.533    | -10.413                |
| 2.0      | 31.32    | 12.68    | 0.643    | -10.428                |
| 2.3      | 29.02    | 10.98    | 0.526    | -10.446                |
| 2.6      | 20.75    | 9.25     | 0.429    | -10.460                |
| 2.9      | 21.44    | 8.56     | 0.477    | -10.491                |
| 3.2      | 20.66    | 9.34     | 0.461    | -10.529                |
| 3.5      | 21.05    | 8.95     | 0.480    | -10.579                |
| 3.7      | 18.93    | 6.07     | 0.502    | -10.615                |
| 4.0      | 18.25    | 3.75     | 0.533    | -10.665                |
| 4.5      | 17.02    | 4.98     | 0.507    | -10.725                |
| 5.0      | 15.62    | 3.38     | 0.515    | -10.799                |
| 5.5      | 13.56    | 2.22     | 0.508    | -10.860                |
| 6.0      | 11.10    | 1.37     | 0.480    | -10.924                |
| 6.5      | 10.02    | 0.52     | 0.475    | -11.051                |
| 7.0      | 9.40     | -0.32    | 0.470    | -11.107                |
| 7.5      | 6.86     | -0.34    | 0.433    | -11.249                |
| 8.0      | 9.99     | -5.38    | 0.494    | -11.447                |
| 8.5      | 8.85     | -6.89    | 0.485    | -11.690                |
| 9.0      | 8.82     | -8.55    | 0.449    | -11.857                |
| 9.5      | 5.97     | -8.85    | 0.470    | -12.097                |
| 10.0     | 5.38     | -11.77   | 0.425    | -12.216                |
| 10.5     | 4.57     | -12.53   | 0.406    | -12.493                |
| 11.0     | 4.37     | -14.12   | 0.368    | -12.640                |
| 12.0     | 4.30     | -16.55   | 0.329    | -12.840                |
| 13.0     | 5.63     | -19.16   | 0.263    | -13.035                |
| 14.0     | 4.41     | -20.57   | 0.254    | -13.232                |
| 15.0     | 6.19     | -24.05   | 0.184    | -13.454                |
| 16.0     | 12.45    | -30.49   | 0.098    | -13.641                |
| 17.0     | 14.39    | -32.07   | 0.109    | -13.825                |
| 18.0     | 21.28    | -39.74   | 0.116    | -14.036                |
| 19.0     | 24.27    | -39.18   | 0.118    | -14.162                |



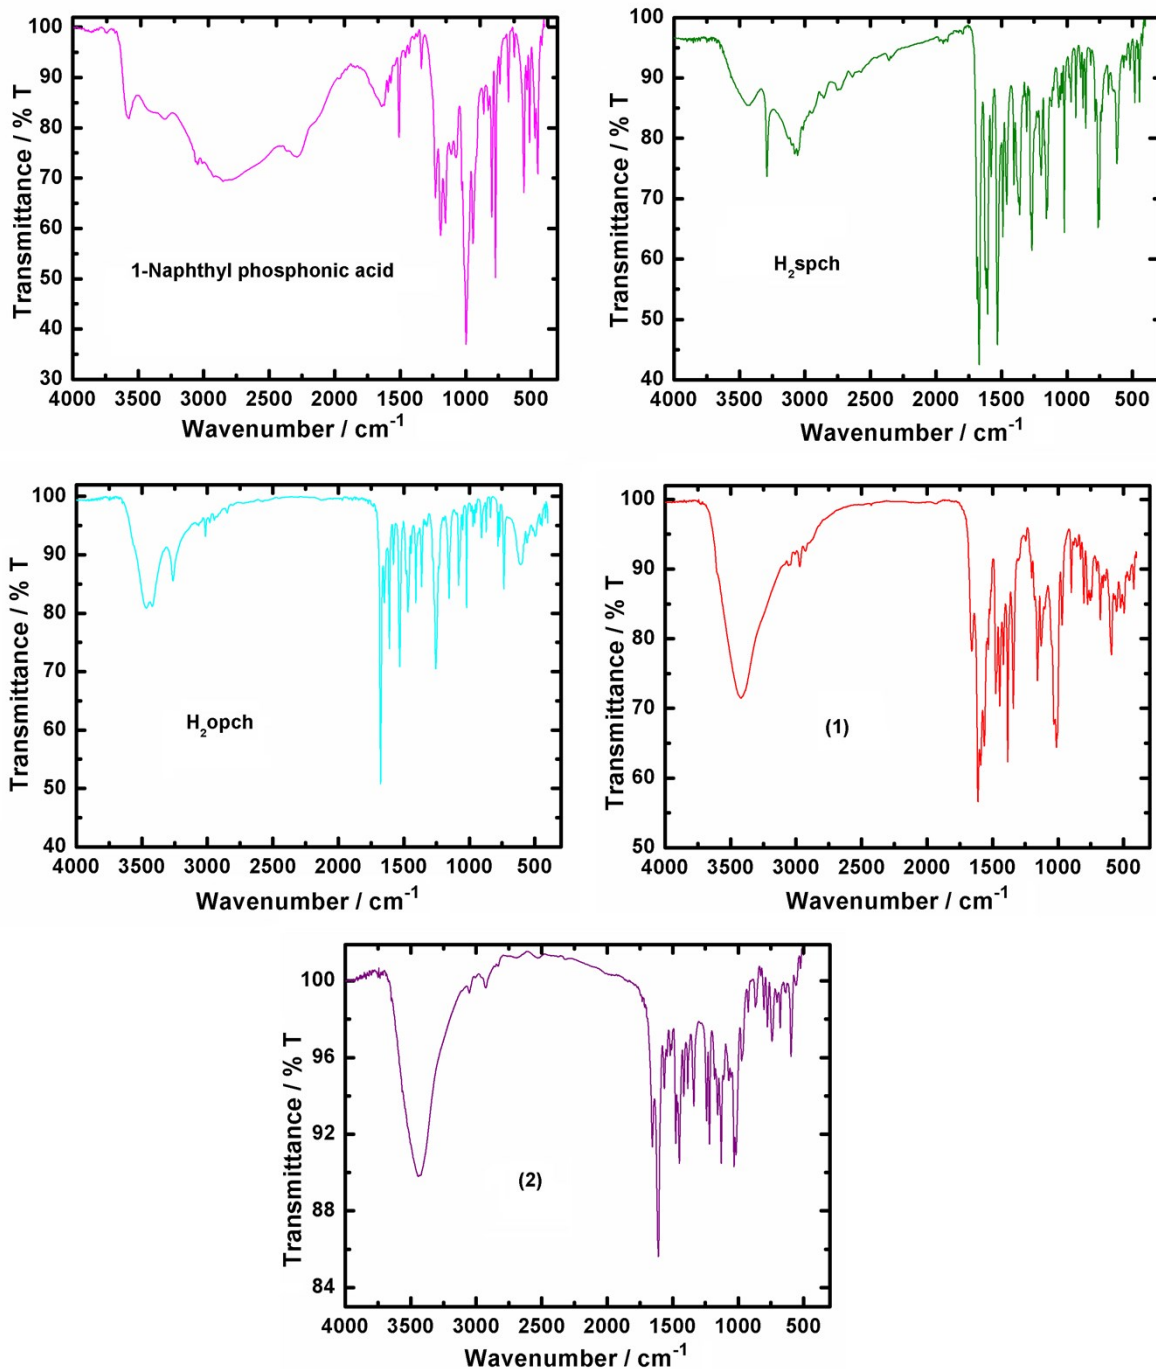

**Figure S1** Infrared spectra of 1-naphthylphosphonic acid, H<sub>2</sub>spch, H<sub>2</sub>opch, 1 and 2.

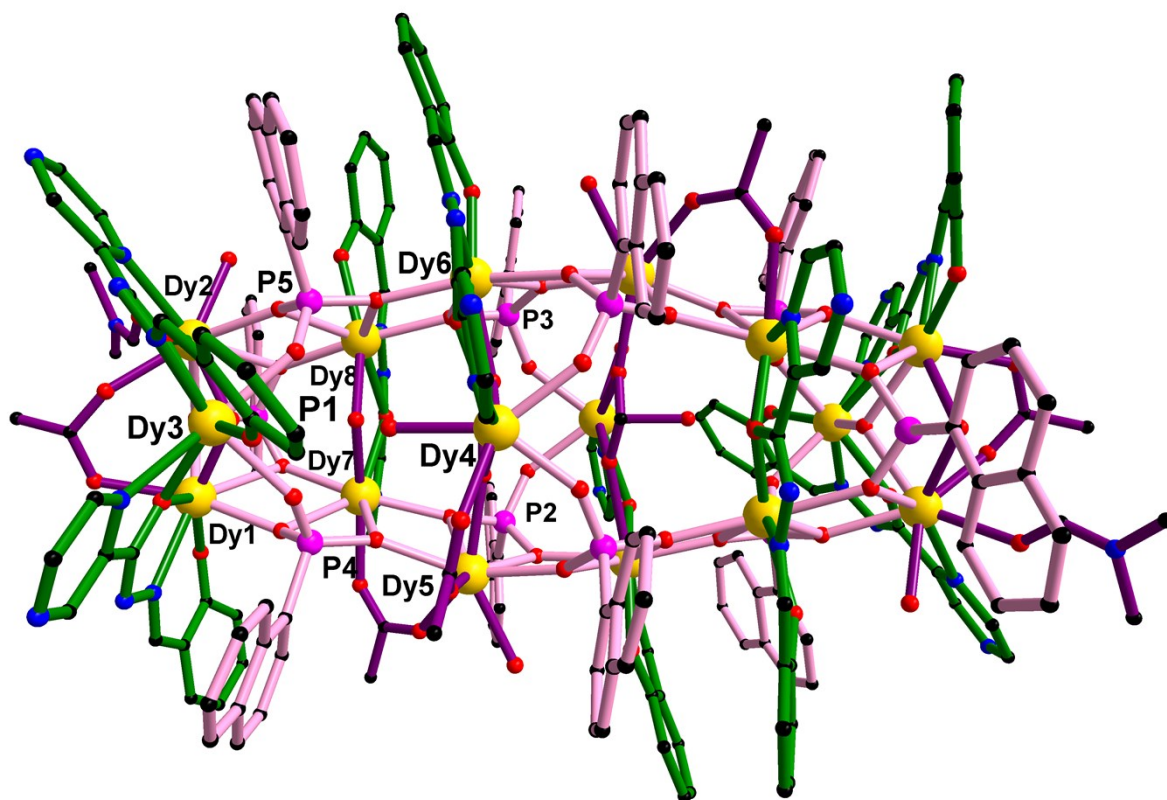

**Figure S2** Partially labeled structure of **1**. The sp<sup>2</sup> fragments are shown in green, the C<sub>10</sub>H<sub>7</sub>PO<sub>3</sub> in rose, Dy in gold, O in red, N in blue, P in pink.

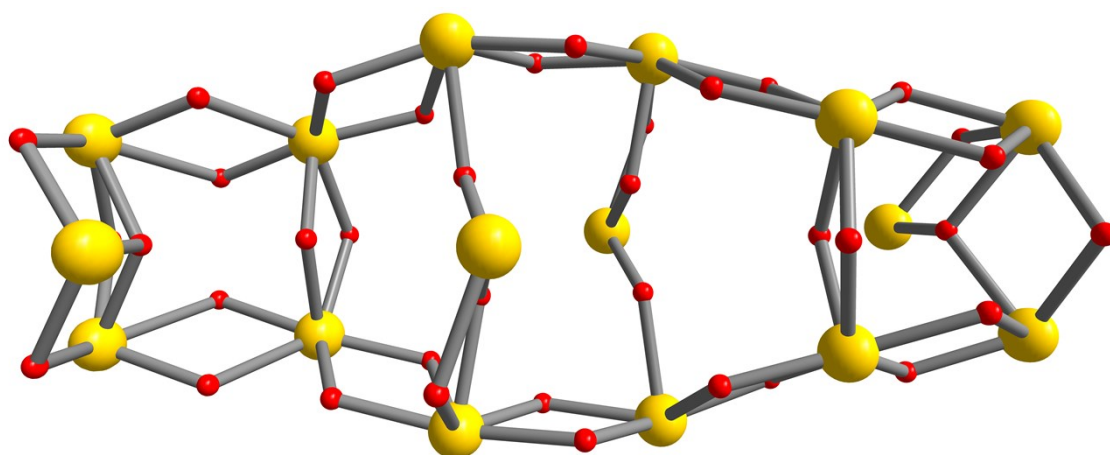

**Figure S3** The Dy<sub>16</sub> core of **1**. Color code: Dy in gold, O in red.

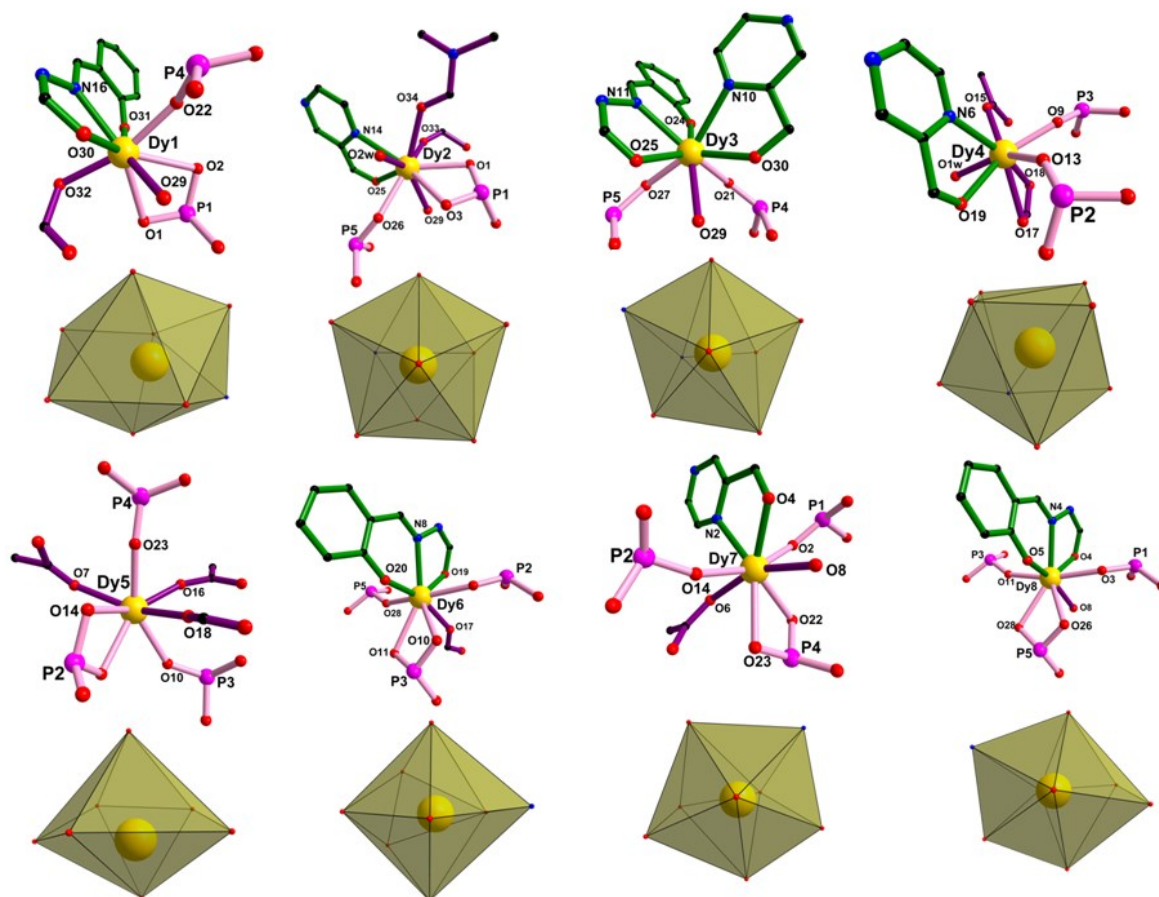

**Figure S4** Coordination environments of eight crystallographically independent Dy ions in **1**. The spch<sub>2</sub><sup>-</sup> fragments are shown in green, the PO<sub>3</sub><sup>2-</sup> in rose, Dy in gold, O in red, N in blue, P in pink.

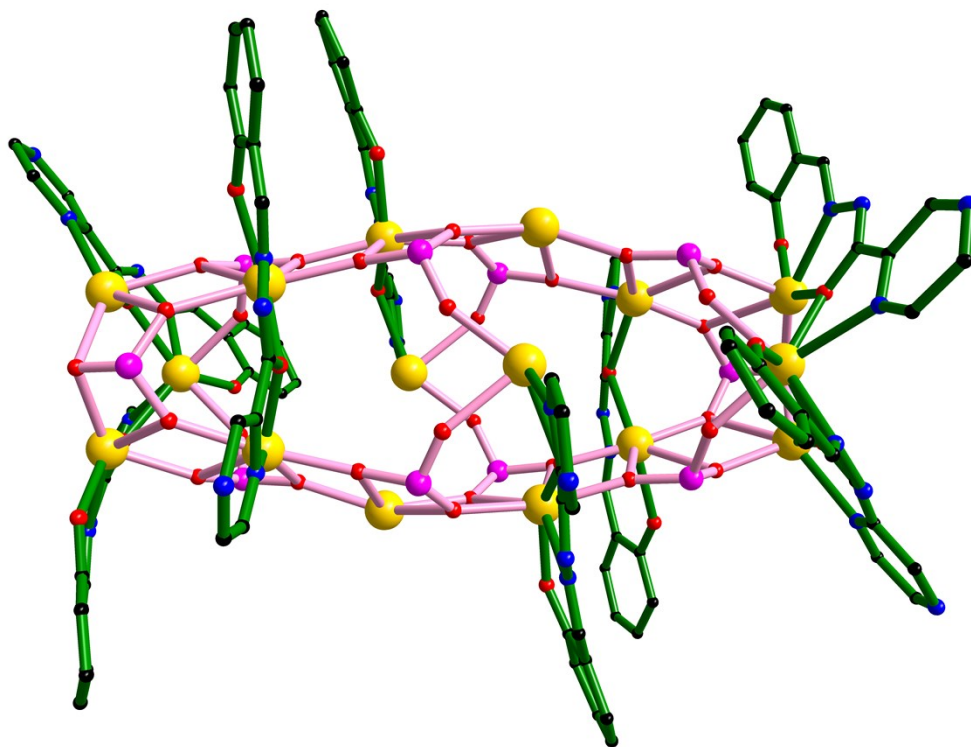

**Figure S5** The  $[\text{Dy}_{16}(\text{spch})_8(\text{PO}_3)_{10}]^{12+}$  core for **1**. The  $\text{spch}^{2-}$  fragments are shown in green, the  $\text{PO}_3^{2-}$  in rose, Dy in gold, O in red, N in blue, P in pink.

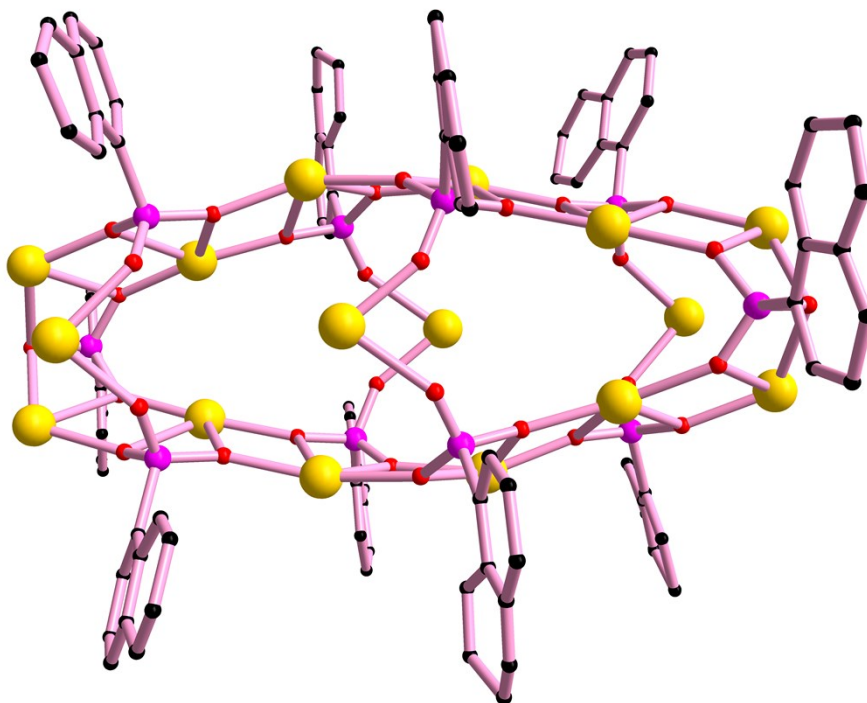

**Figure S6** The  $[\text{Dy}_{16}(\text{C}_{10}\text{H}_7\text{-PO}_3)_{10}]^{28+}$  core for **1**. Color code: the  $\text{C}_{10}\text{H}_7\text{PO}_3$  in rose, Dy in gold, O in red, P in pink.

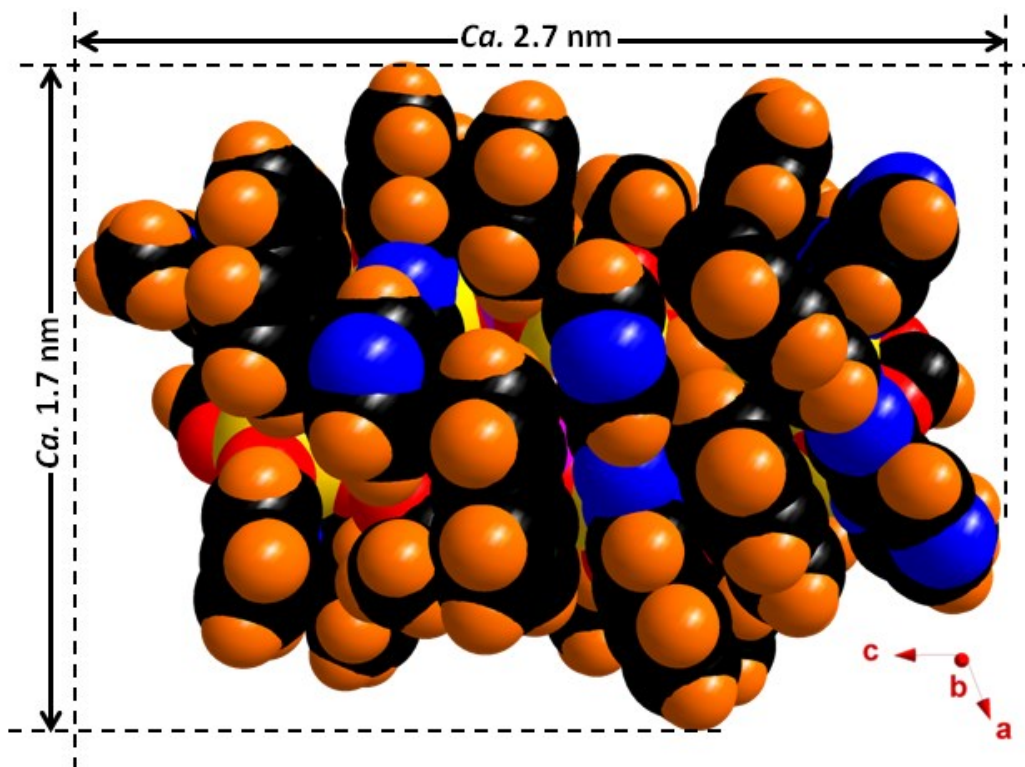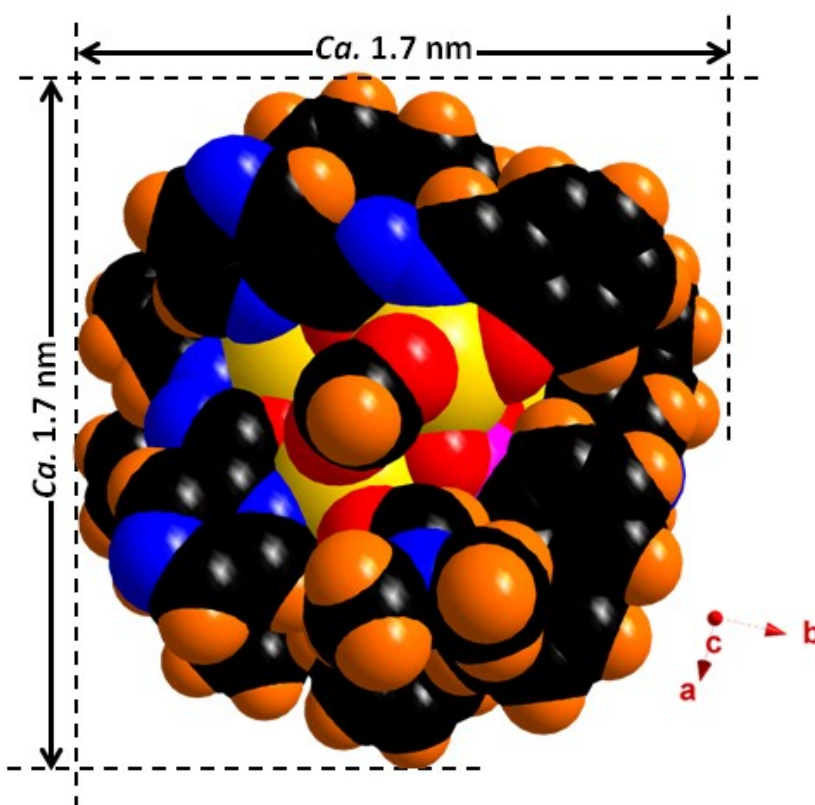

**Figure S7** Space-filling representation exhibiting the longest (top) and shortest (bottom) diameters of **1**. Color code: Dy in gold, O in red, P in pink, H in orange.

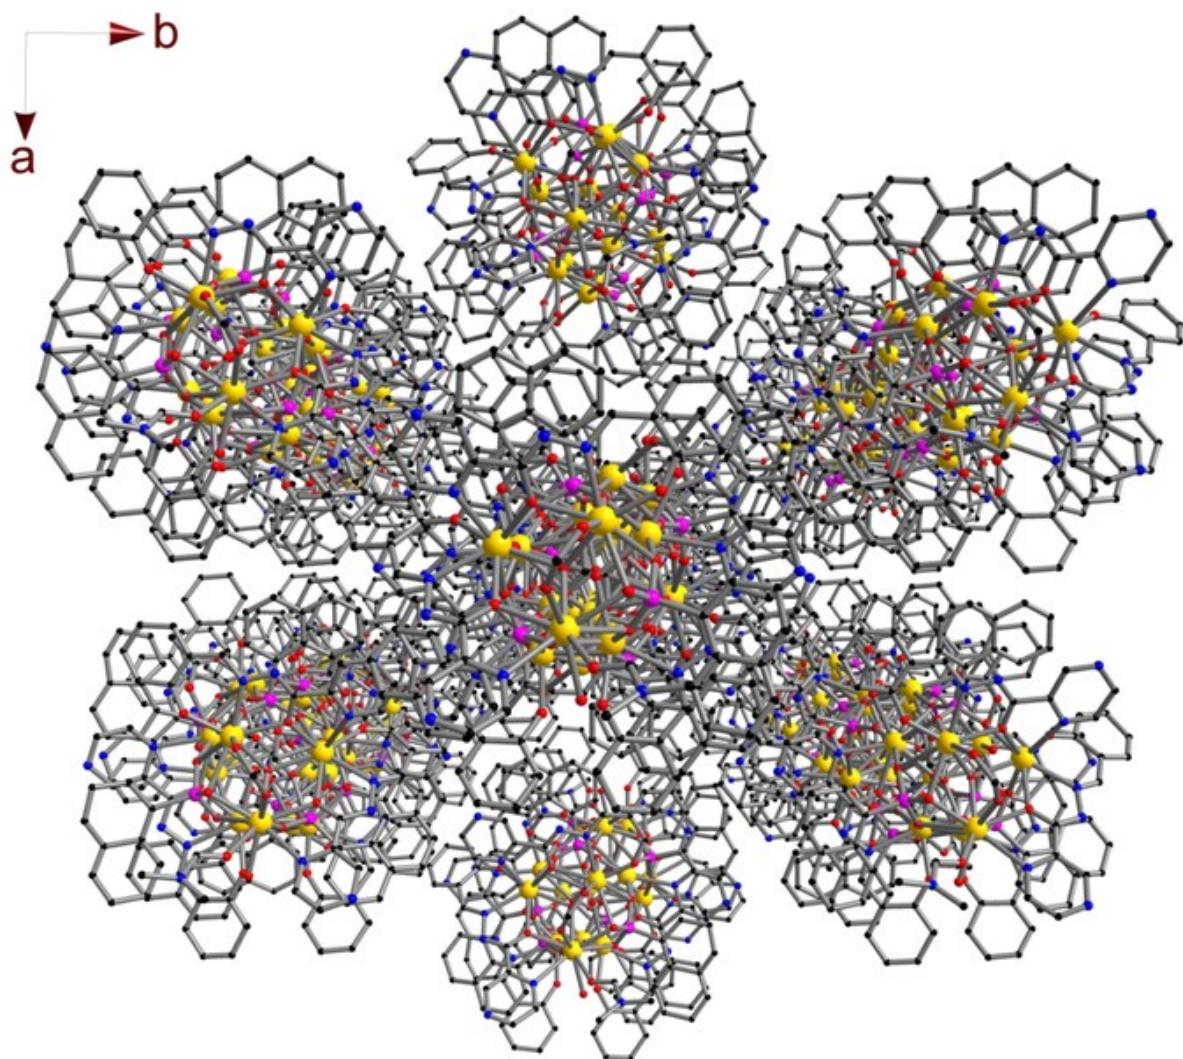

**Figure S8** The molecular packing viewed along the  $c$  axis in **1**.

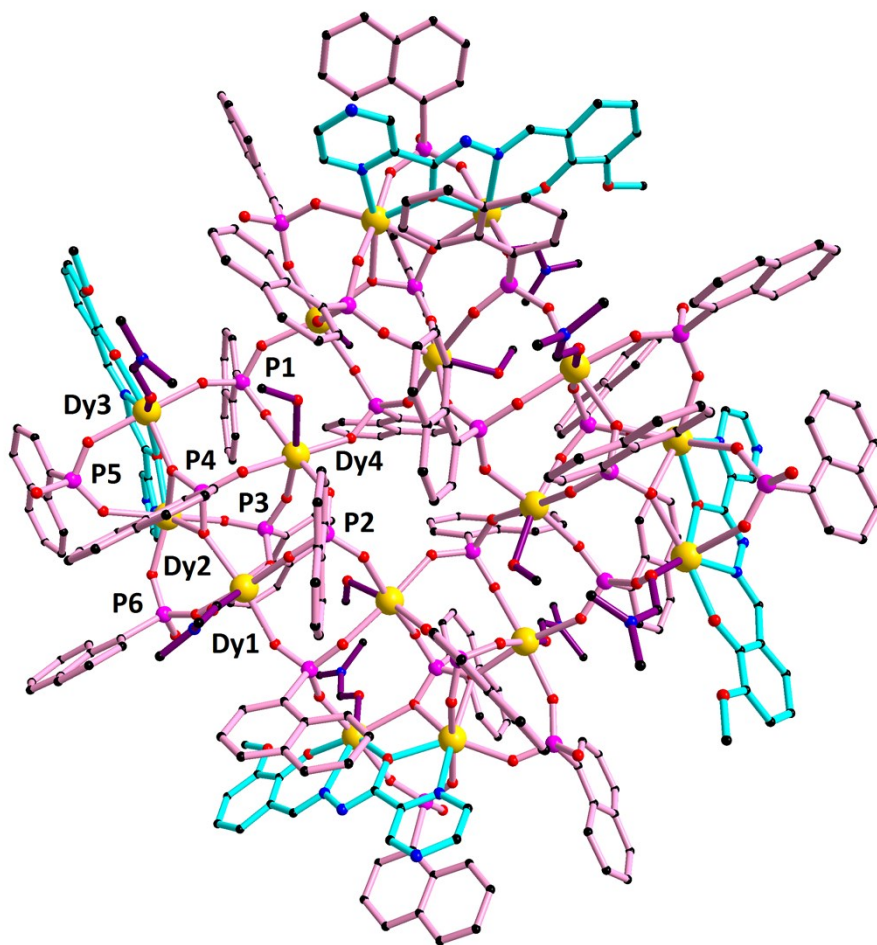

**Figure S9** Partially labeled structure of **2**. The opch<sup>2-</sup> fragments are shown in turquoise, the C<sub>10</sub>H<sub>7</sub>PO<sub>3</sub> in rose, Dy in gold, O in red, N in blue, P in pink.

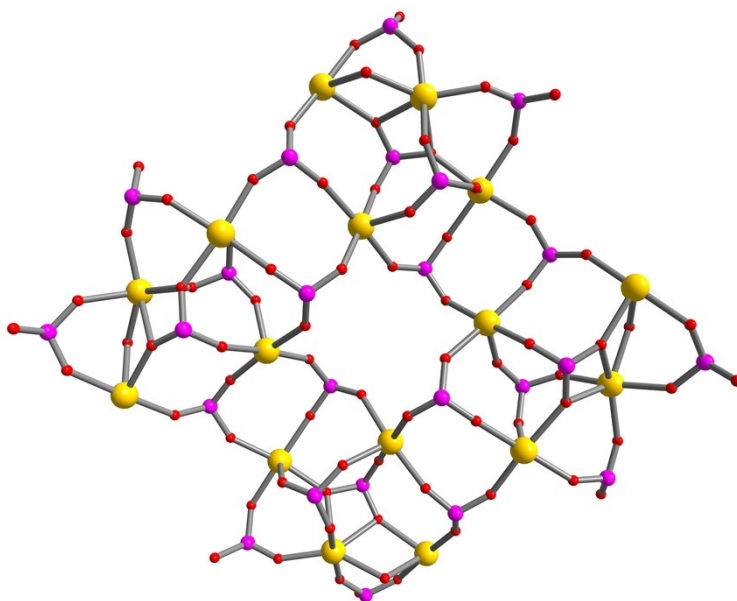

**Figure S10** The Dy<sub>16</sub> core of **2**. Color code: Dy in gold, O in red, P in pink.

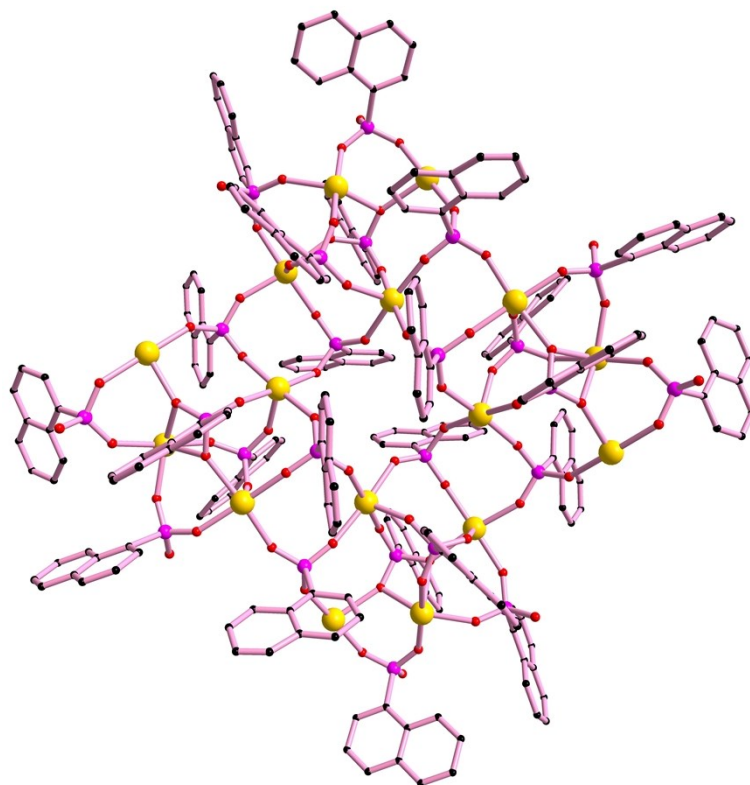

**Figure S11** The  $[\text{Dy}_{16}(\text{C}_{10}\text{H}_7\text{-PO}_3)_{24}]^{8+}$  core for **2**. Color code: the  $\text{C}_{10}\text{H}_7\text{PO}_3$  in rose, Dy in gold, O in red, P in pink.

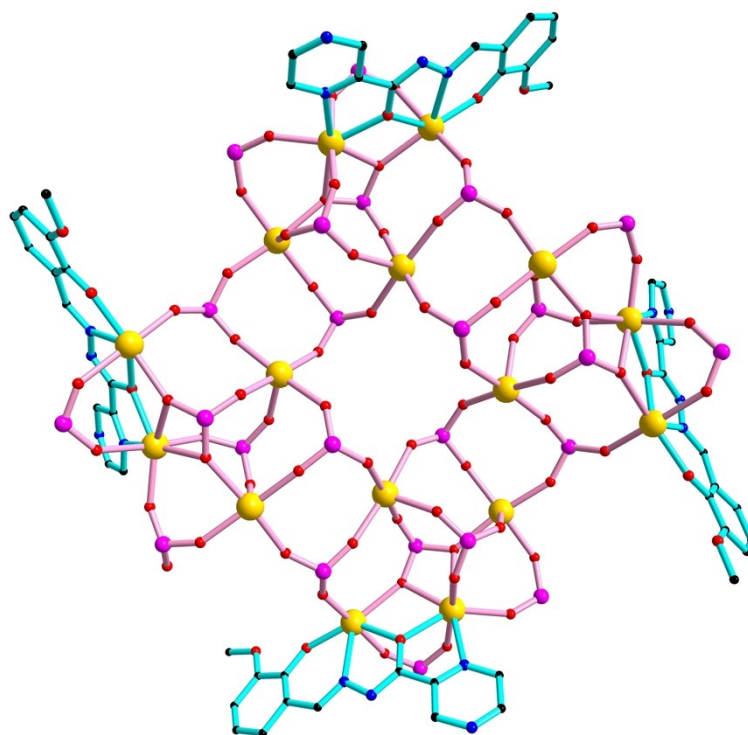

**Figure S12** The  $[\text{Dy}_{16}(\text{spch})_8(\text{PO}_3)_{10}]^{12+}$  core for **2**. The  $\text{opch}^{2-}$  fragments are shown in turquoise, the  $\text{PO}_3^{2-}$  in rose, Dy in gold, O in red, N in blue, P in pink.



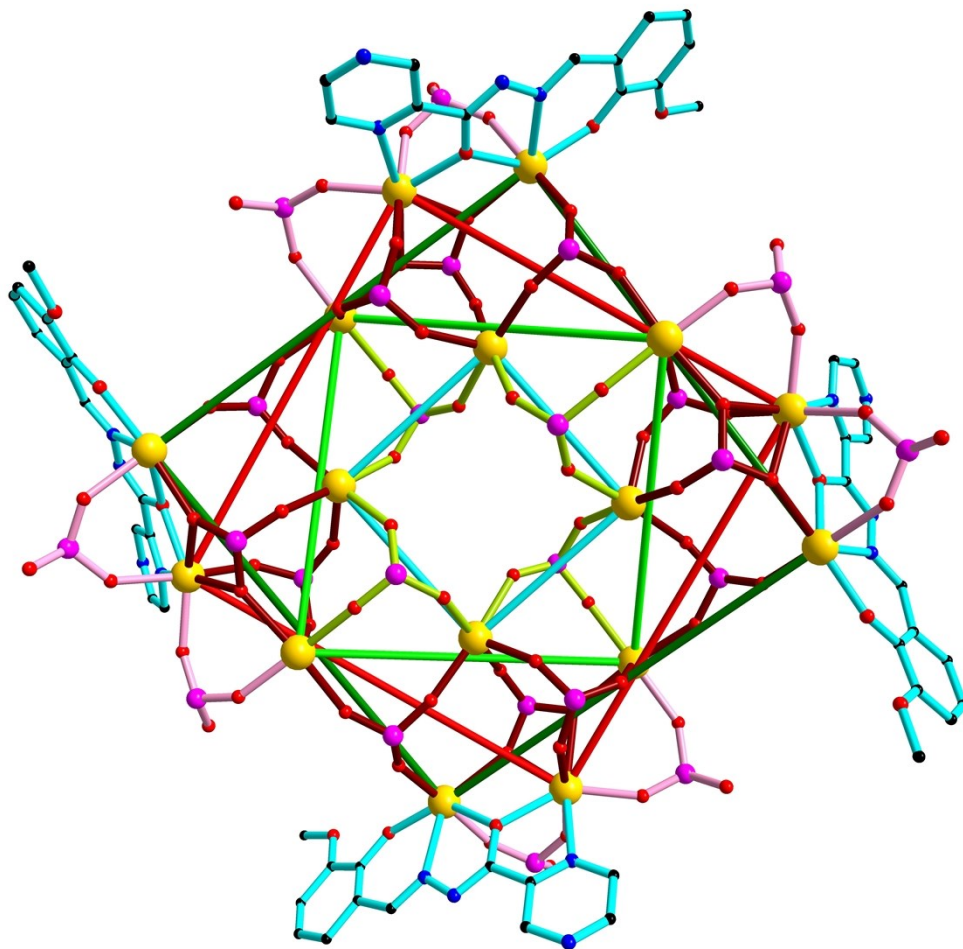

**Figure S13** The turquoise, bright green, red and green squares denote square-within-square-within-square planar structures in **2**.

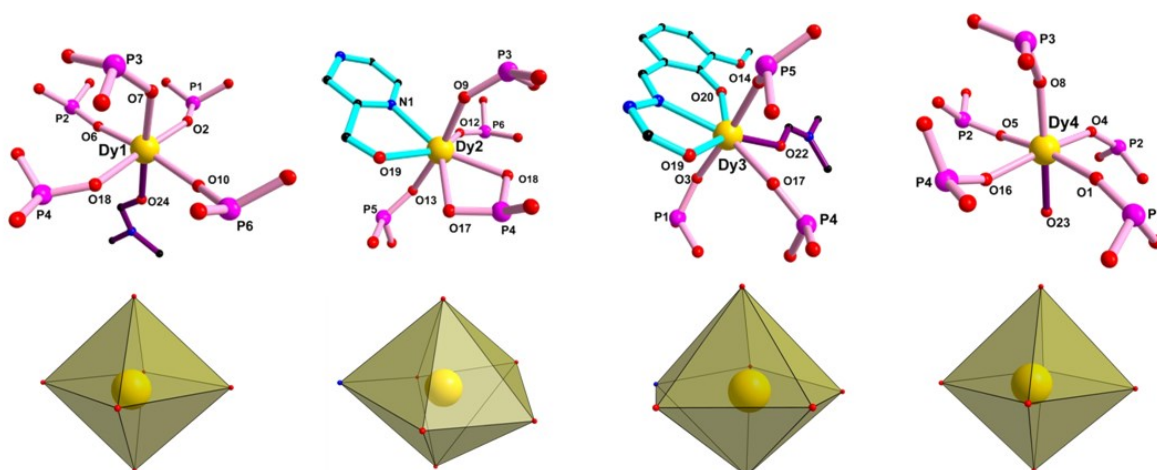

**Figure S14** Coordination environments of four crystallographically independent Dy ions in **2**. The  $\text{opch}^{2-}$  fragments are shown in turquoise, the  $\text{PO}_3^{2-}$  in rose, Dy in gold, O in red, N in blue, P in pink.

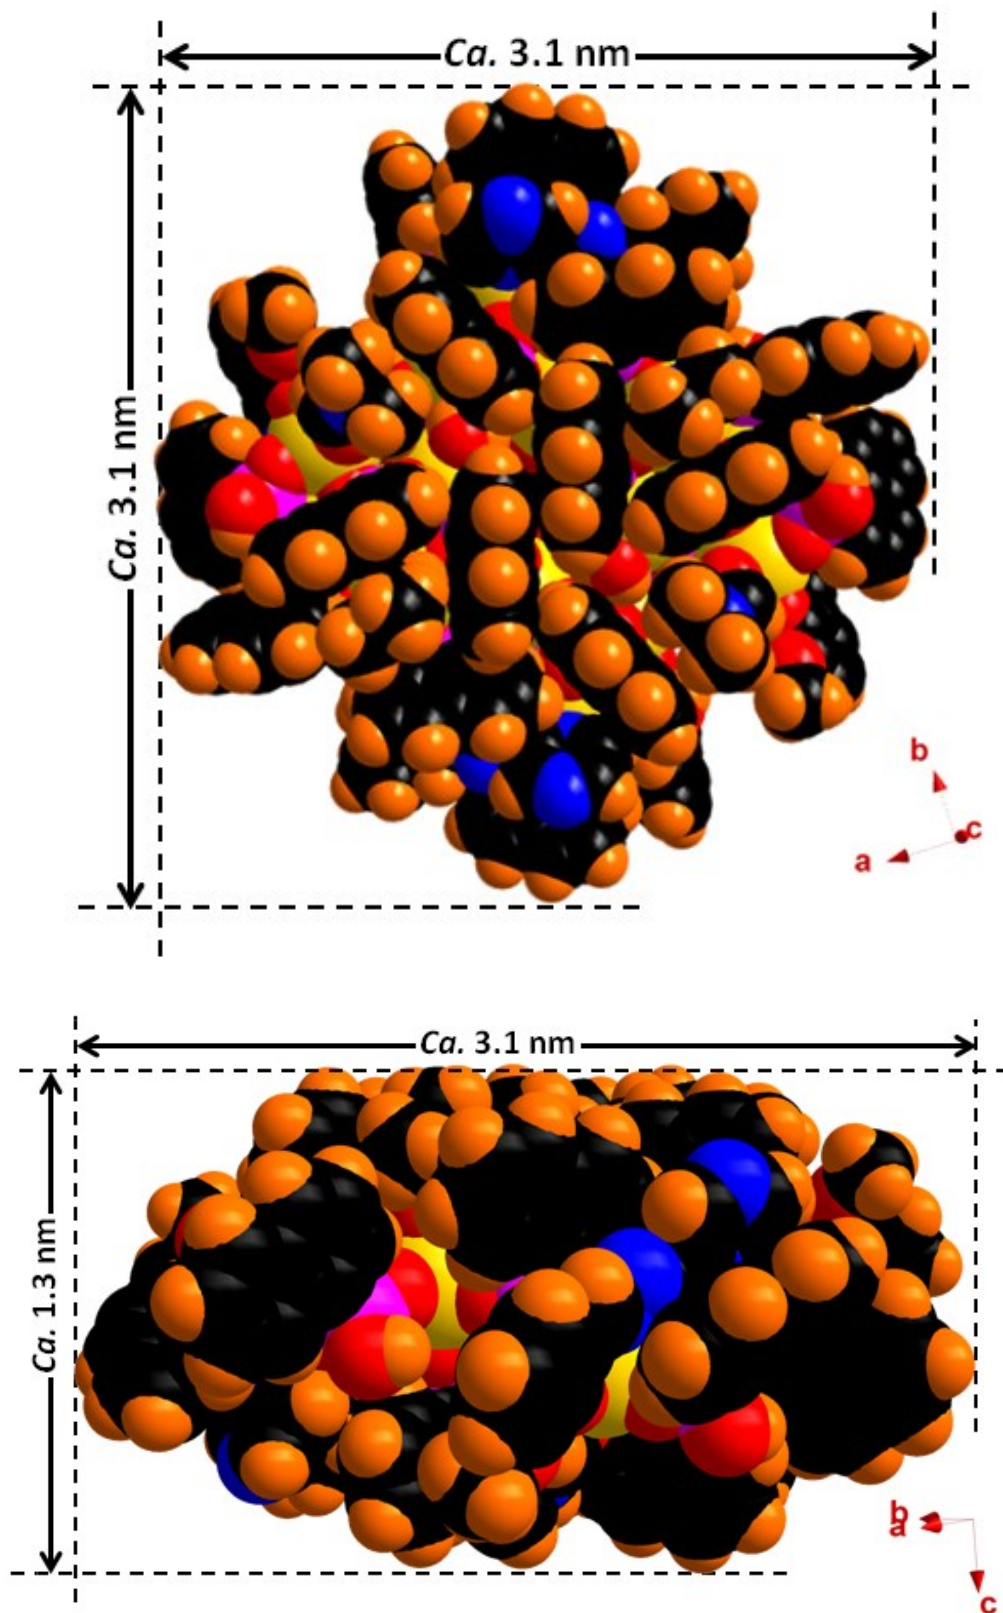

**Figure S15** Space-filling representation exhibiting outer diameter (top) and thickness (bottom) of **2**. Color code: Dy in gold, O in red, P in pink, H in orange.

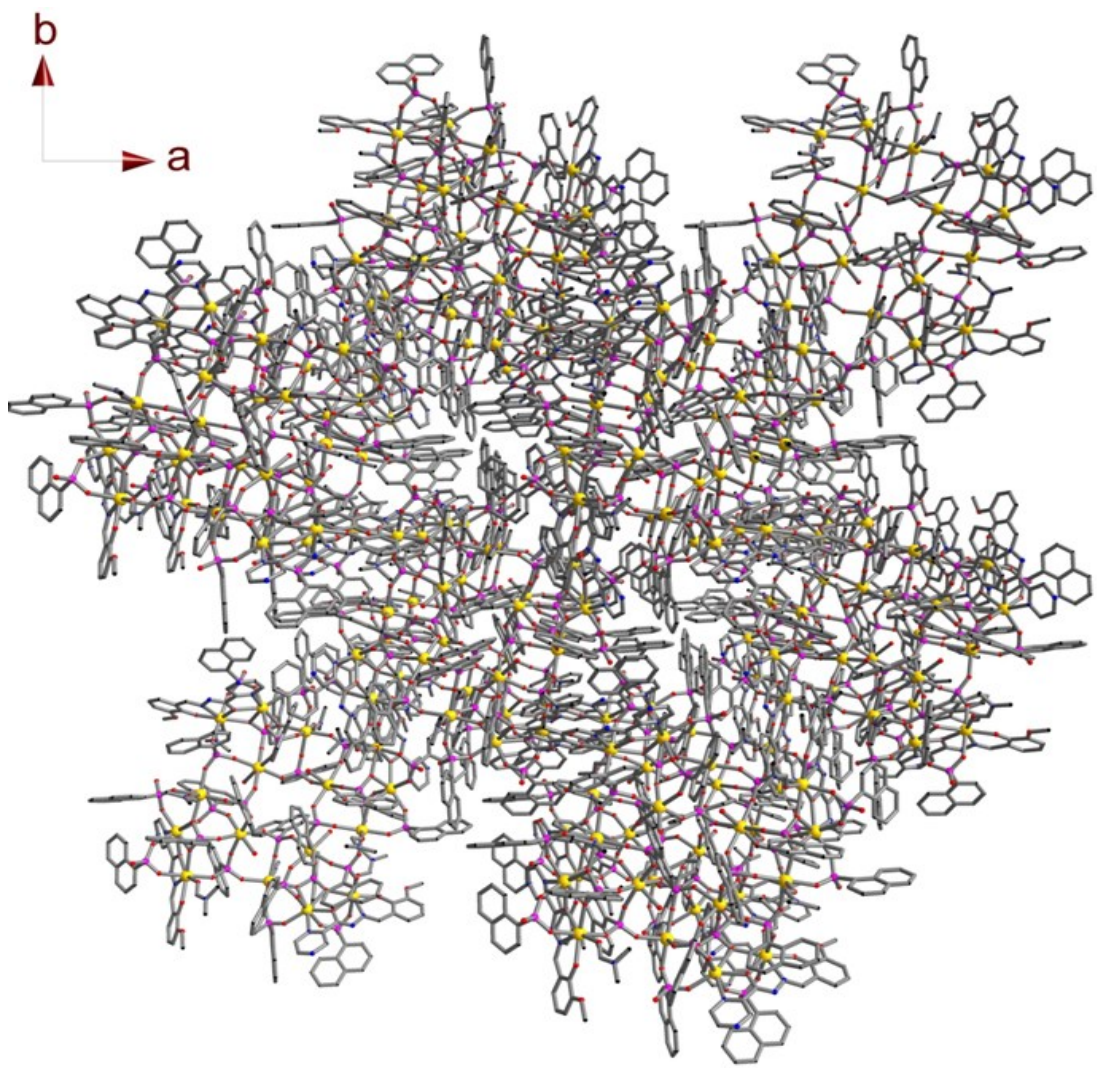

**Figure S16** The molecular packing viewed along the *c* axis in **2**.

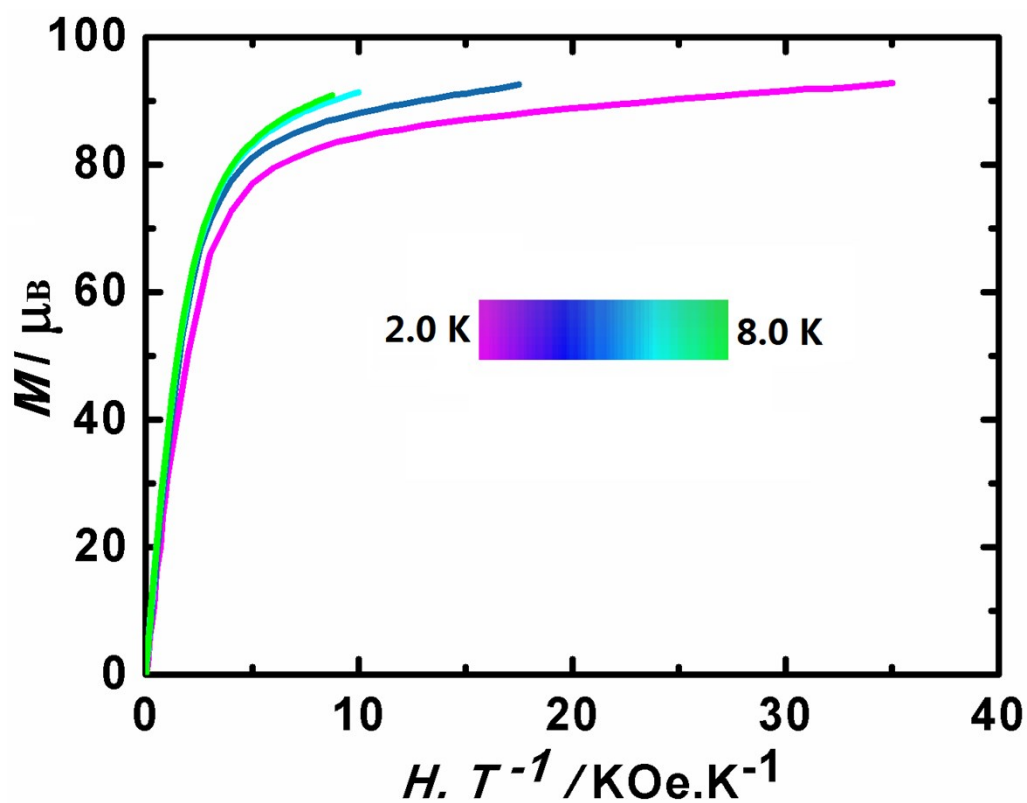

Figure S17  $M$  vs.  $H/T$  plot for **1** at temperature range of 2.0 K – 8.0 K.

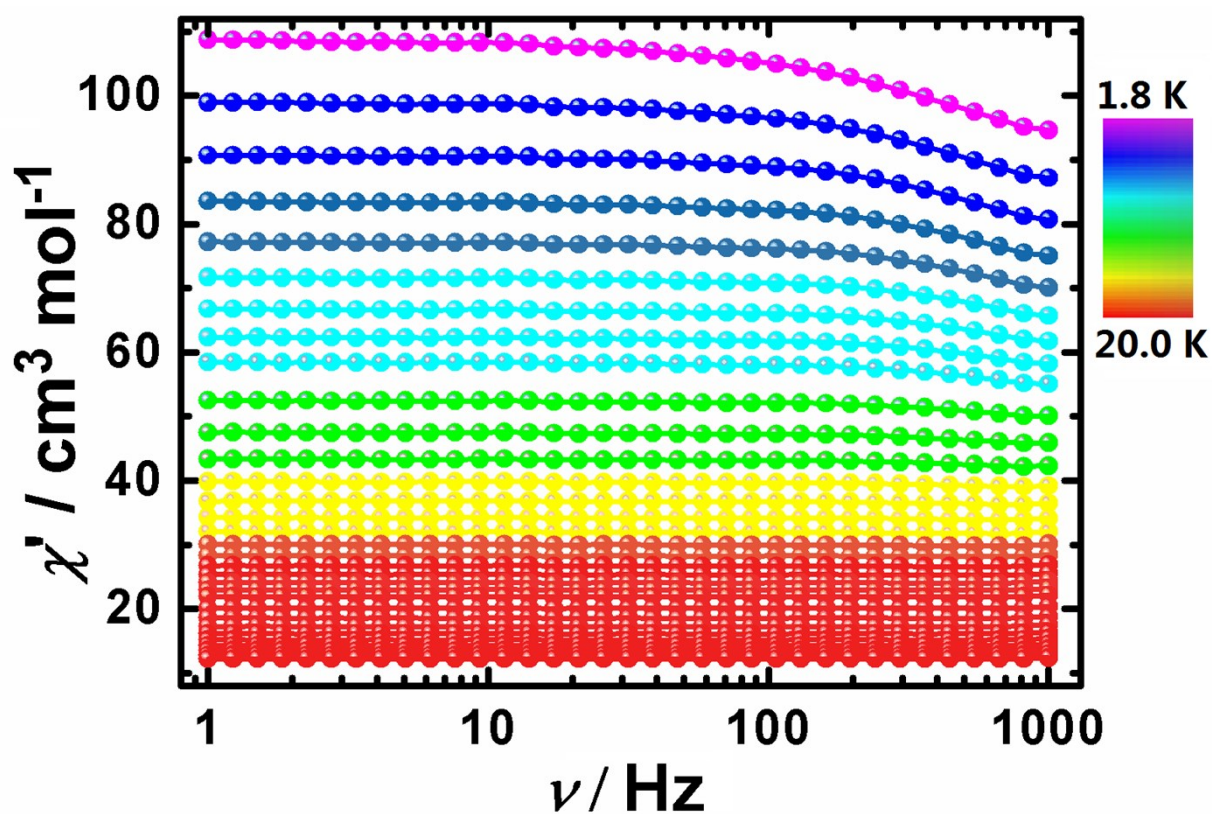

Figure S18 Frequency dependence of the  $\chi'$  product,  $ac$  susceptibilities under zero  $dc$  field for **1**.

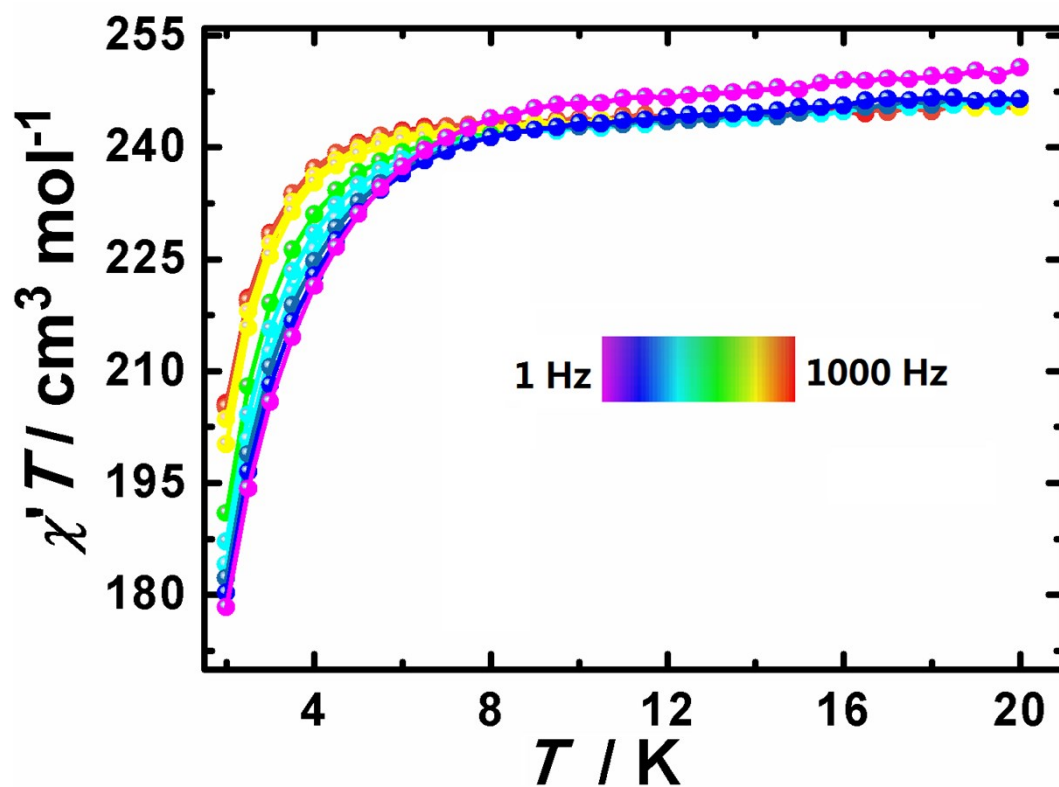

Figure S19 Frequency dependence of the  $\chi' T$  product, *ac* susceptibilities under zero *dc* field for 1.

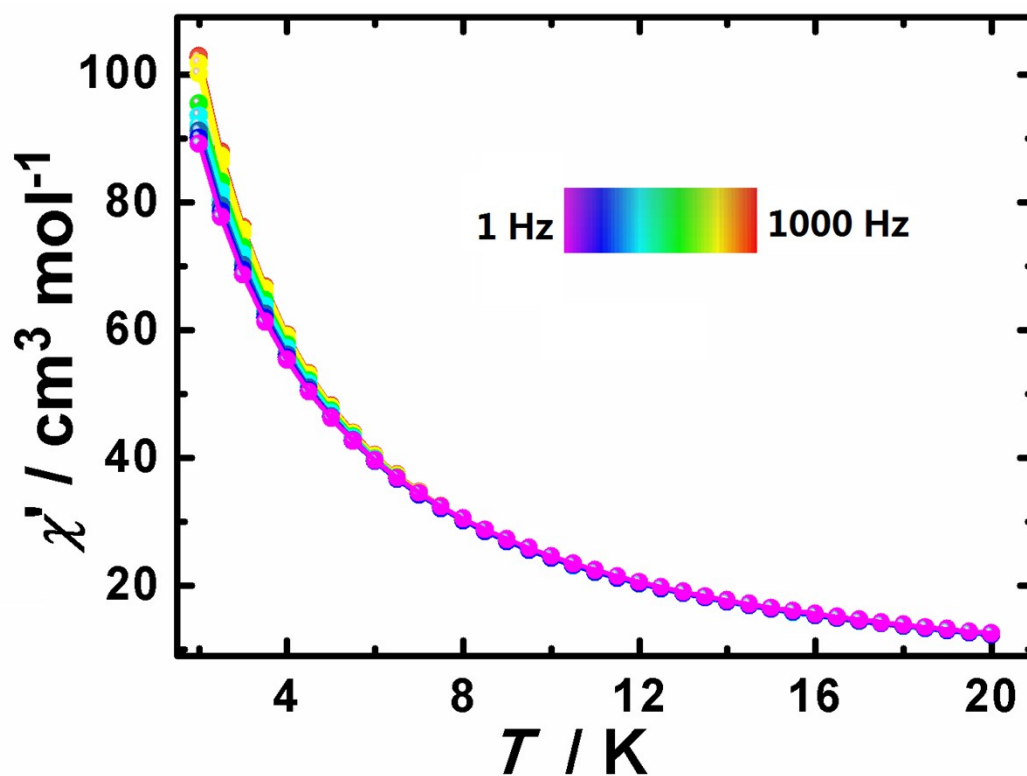

Figure S20 Temperature dependence of the  $\chi'$  product, *ac* susceptibilities under zero *dc* field for 1.

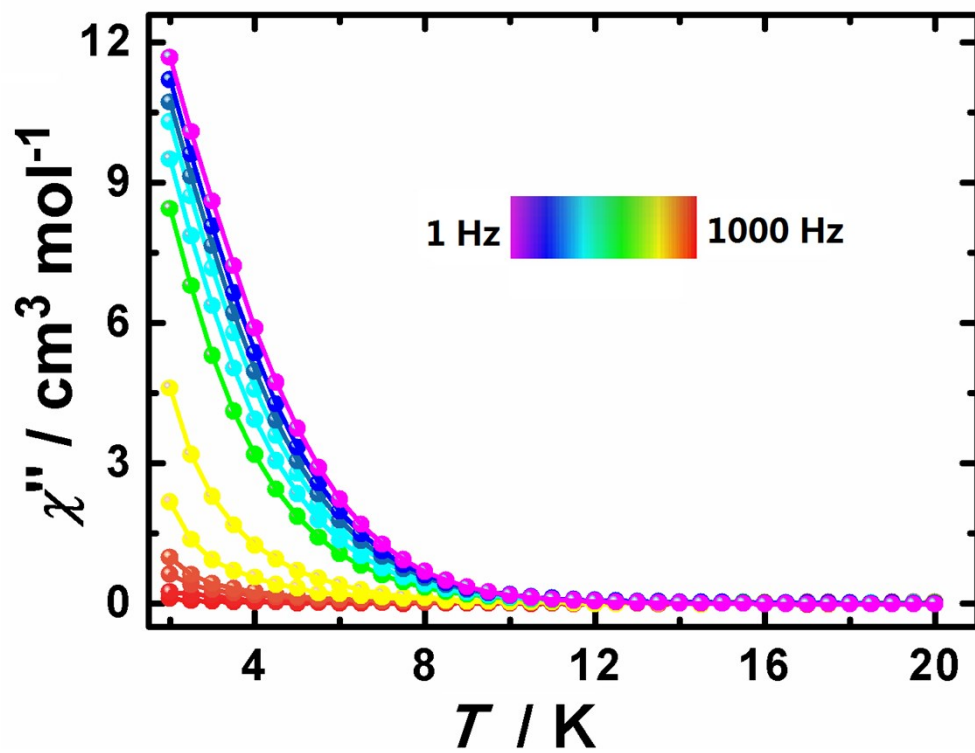

Figure S21 Temperature dependence of the  $\chi''$  product, *ac* susceptibility under zero *dc* field for **1**.

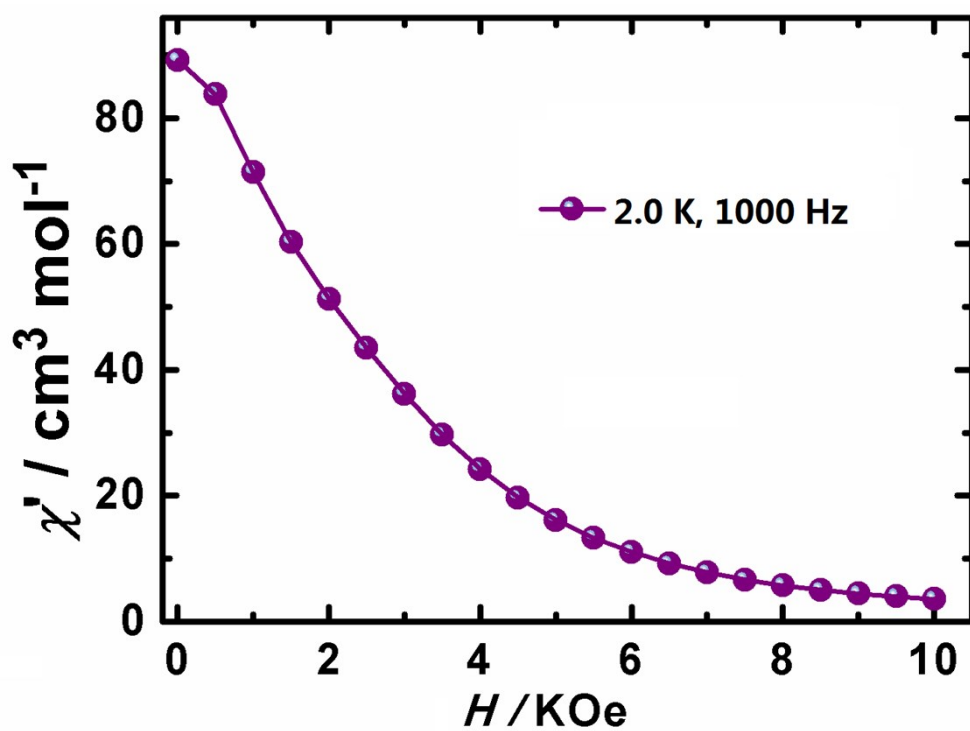

Figure S22 Field dependence of the  $\chi'$  product, *ac* susceptibility of **1** at 1000 Hz and 2 K.

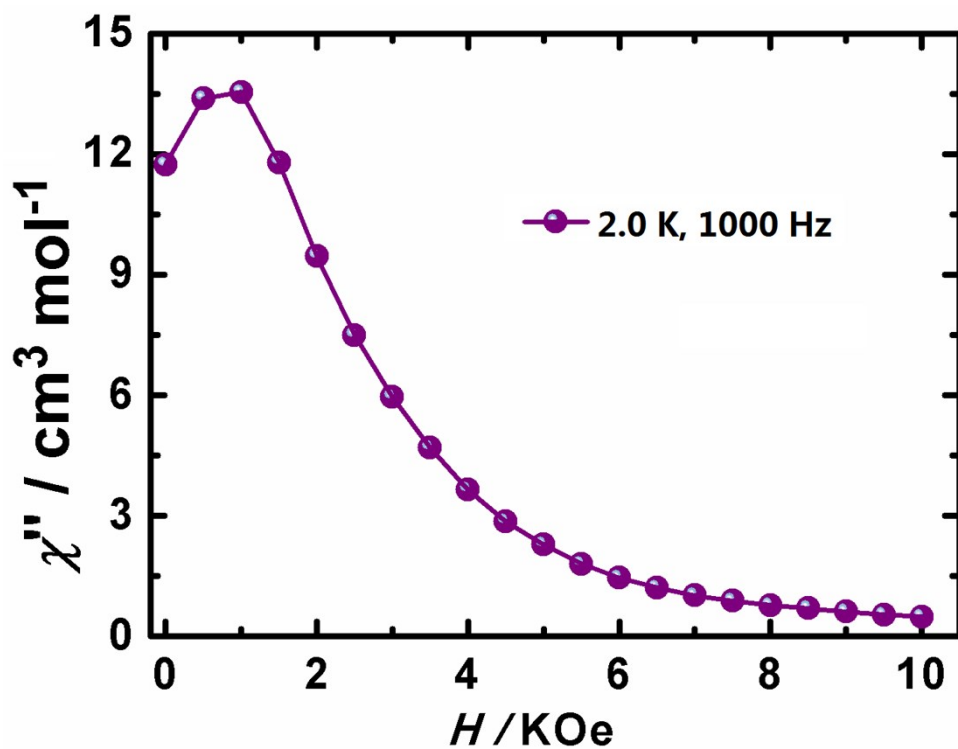

Figure S23 Field dependence of the  $\chi''$  product, *ac* susceptibility of 1 at 1000 Hz and 2 K.

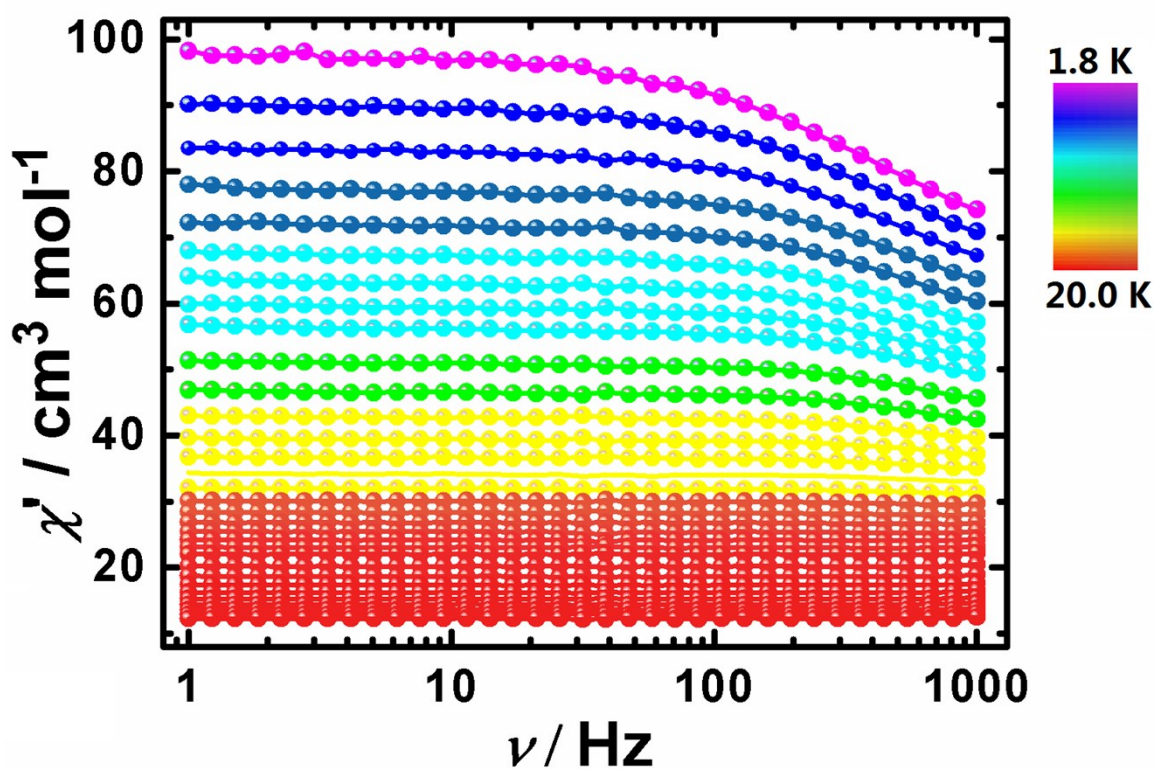

Figure S24 Frequency dependence of the  $\chi'$  product, *ac* susceptibilities under 1.0 kOe *dc* field for 1.

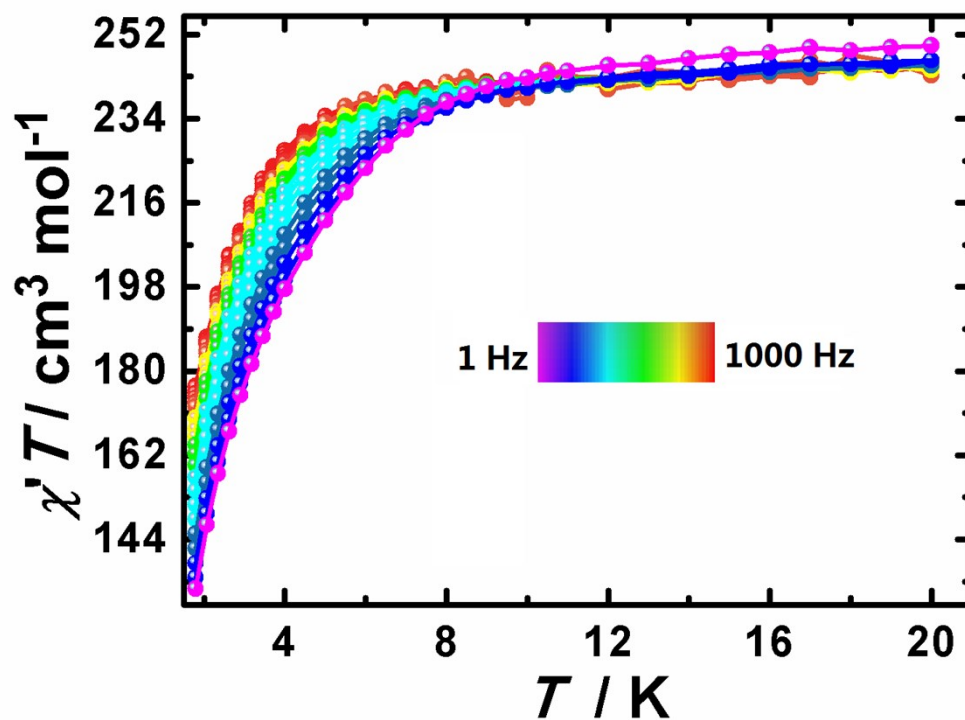

Figure S25 Frequency dependence of the  $\chi'T$  product, *ac* susceptibilities under 1.0 kOe *dc* field for 1.

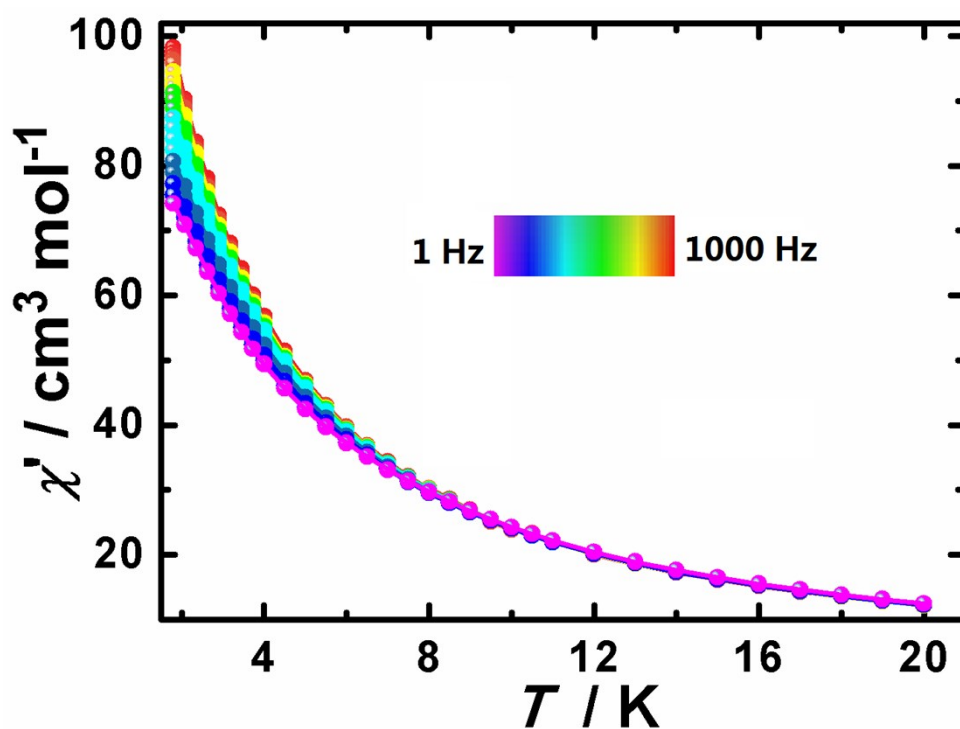

Figure S26 Temperature dependence of the  $\chi'$  product, *ac* susceptibilities under 1.0 kOe *dc* field for 1.



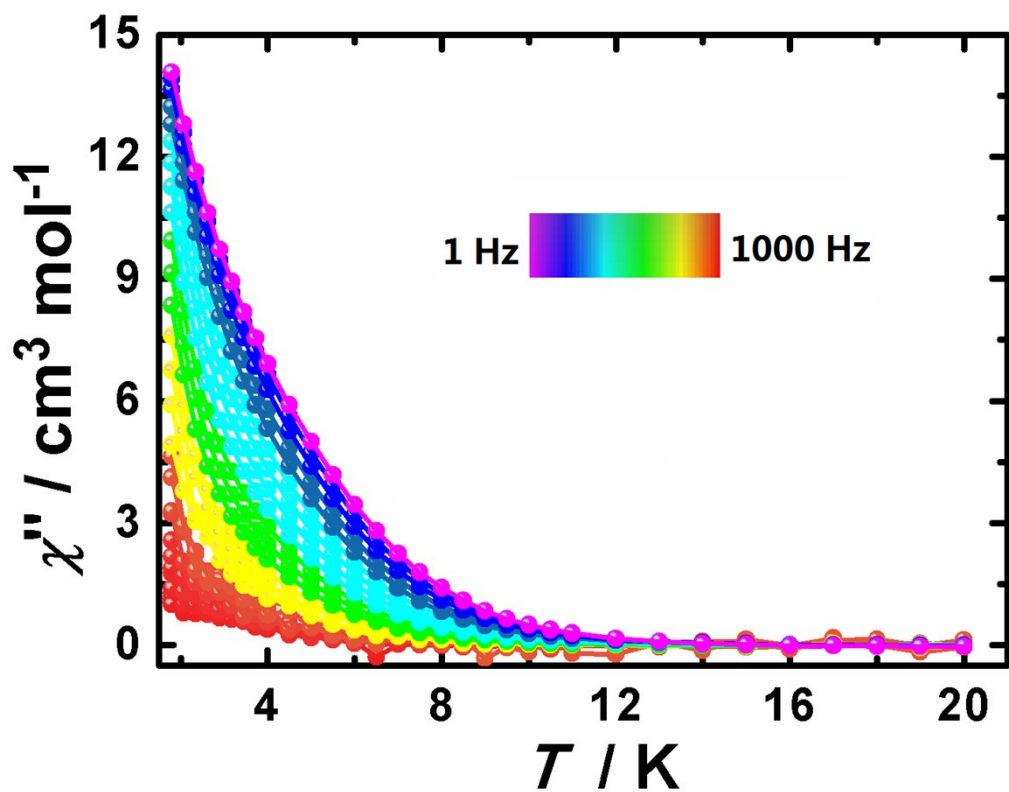

Figure S27 Temperature dependence of the  $\chi''$  product, *ac* susceptibility under 1.0 kOe *dc* field for 1.

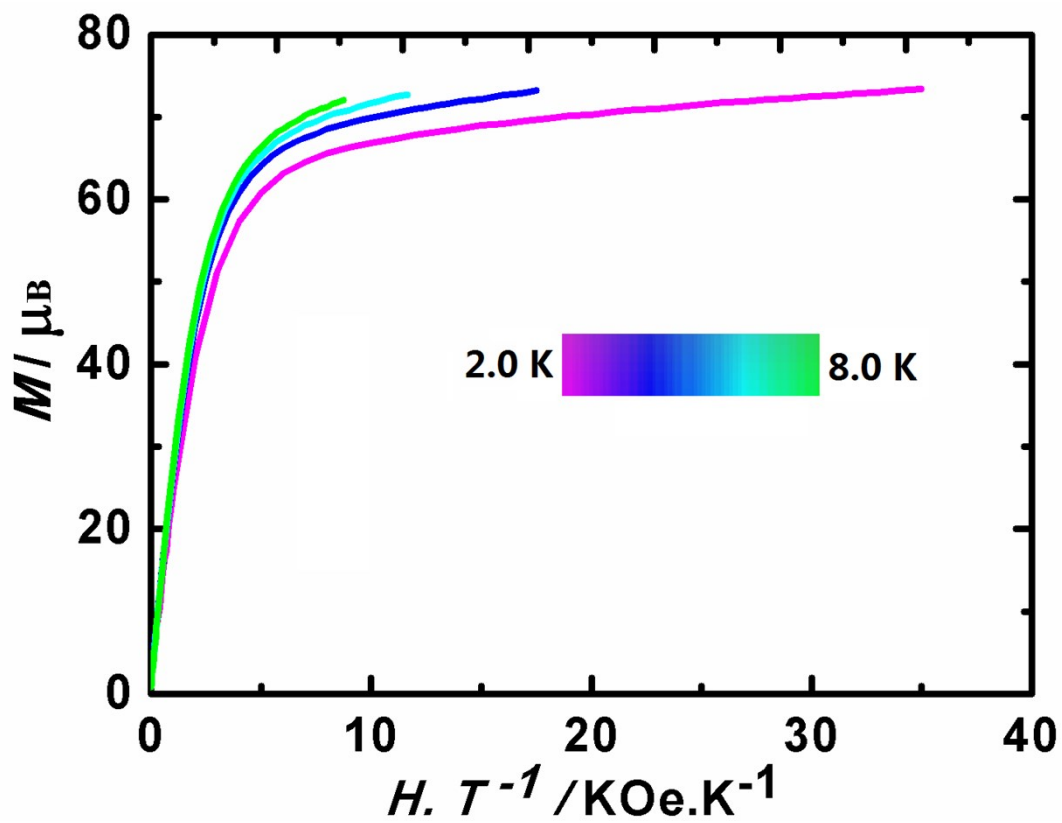

Figure S28  $M$  vs.  $H/T$  plot for 2 at temperature range of 2.0 K – 8.0 K.

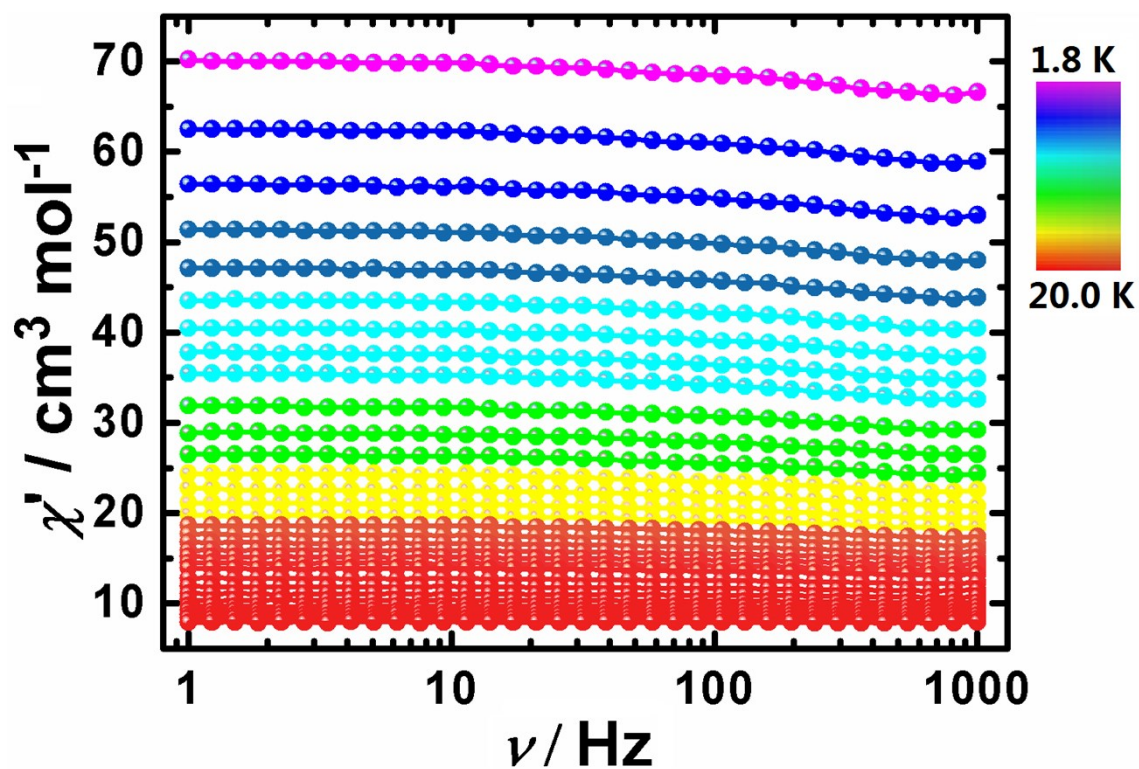

Figure S29 Frequency dependence of the  $\chi'$  product, *ac* susceptibilities under zero *dc* field for 2.

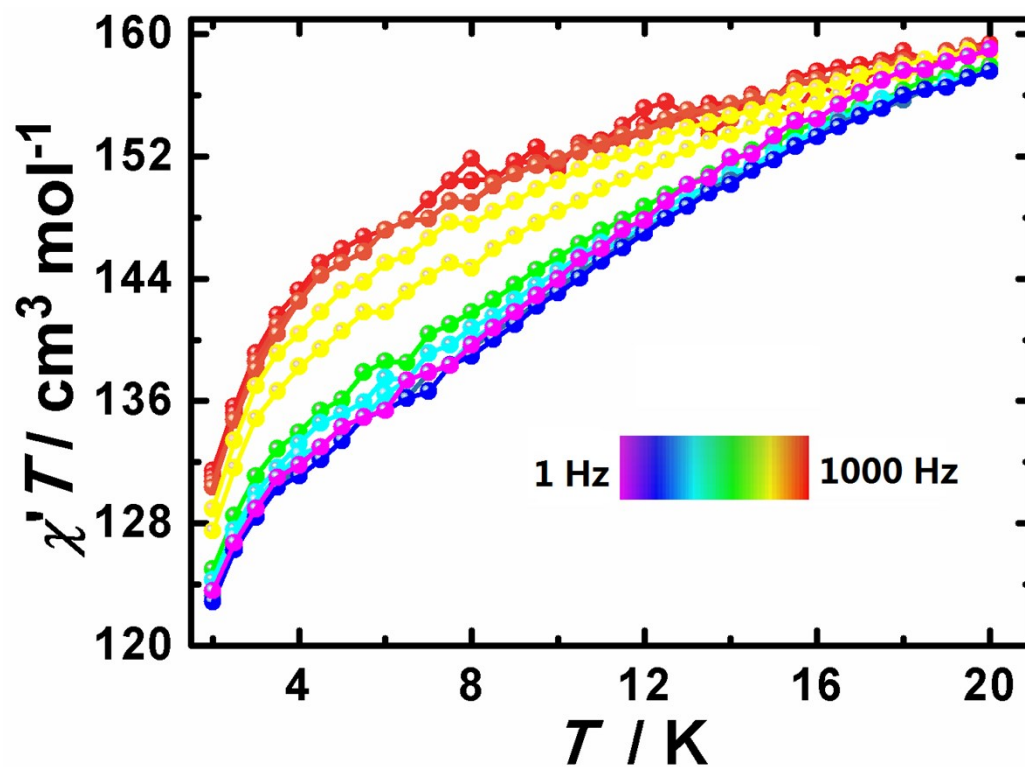

Figure S30 Frequency dependence of the  $\chi'T$  product, *ac* susceptibilities under zero *dc* field for 2.

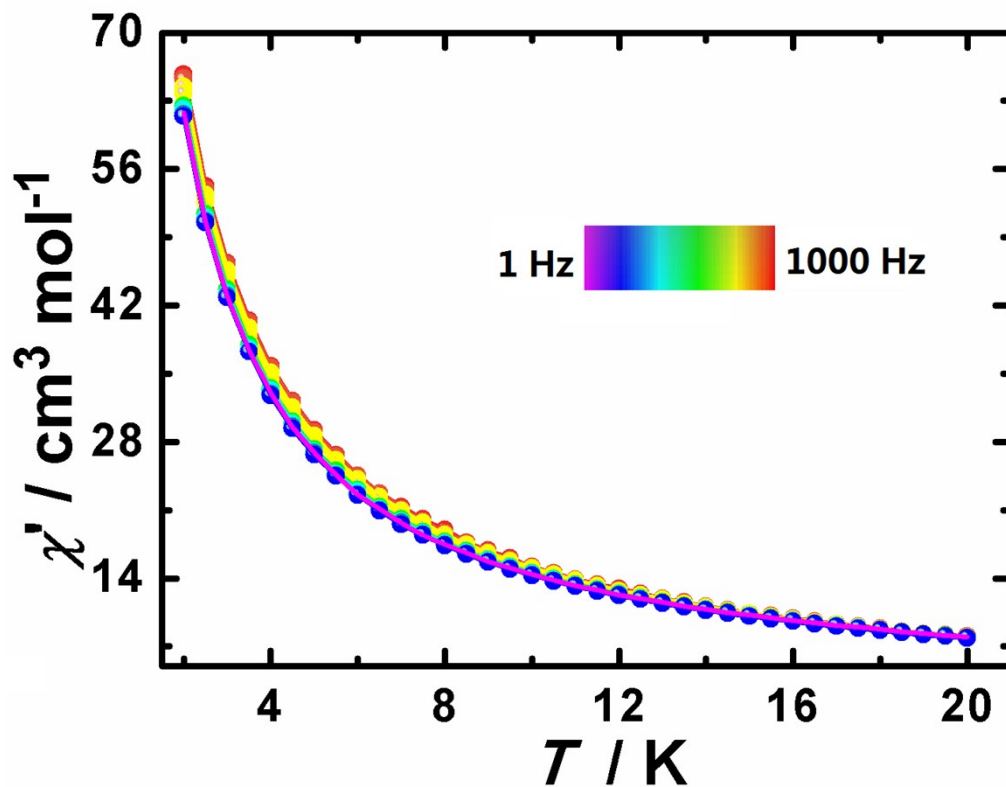

Figure S31 Temperature dependence of the  $\chi'$  product,  $ac$  susceptibilities under zero  $dc$  field for 2.

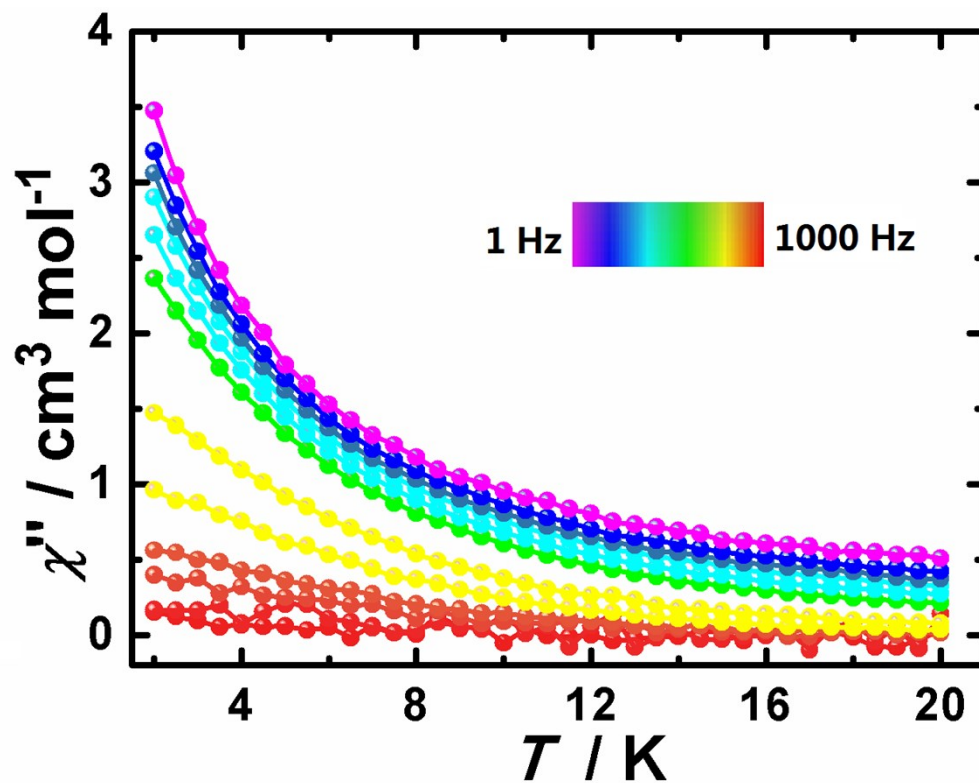

Figure S32 Temperature dependence of the  $\chi''$  product,  $ac$  susceptibility under zero  $dc$  field for 2.

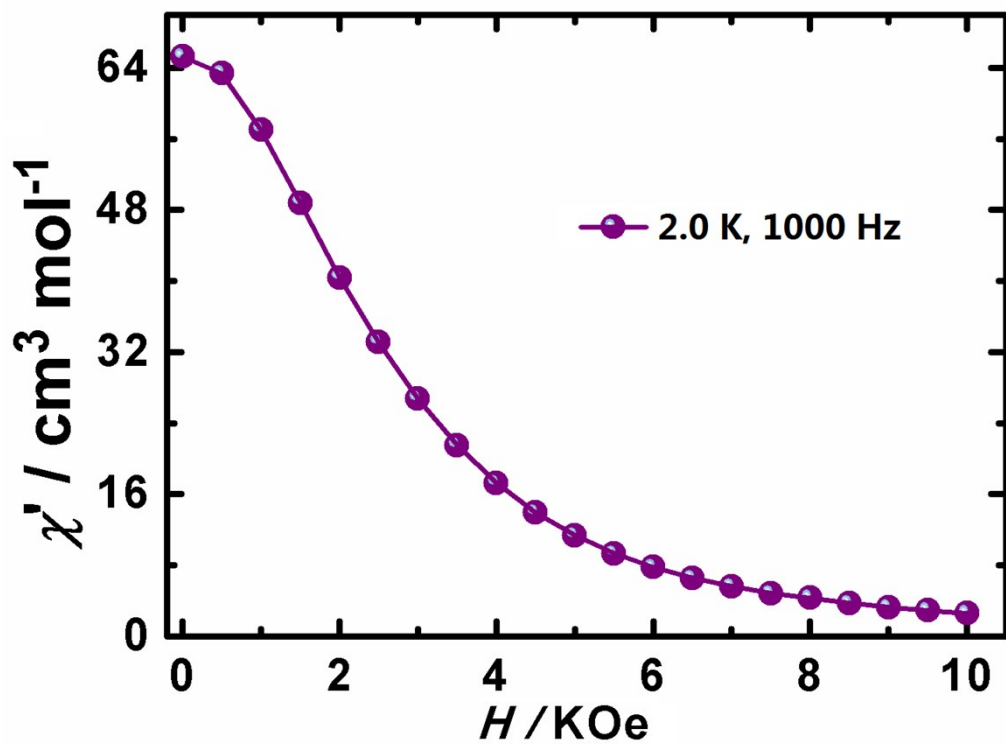

Figure S33 Field dependence of the  $\chi'$  product, ac susceptibility of 2 at 1000 Hz and 2 K.

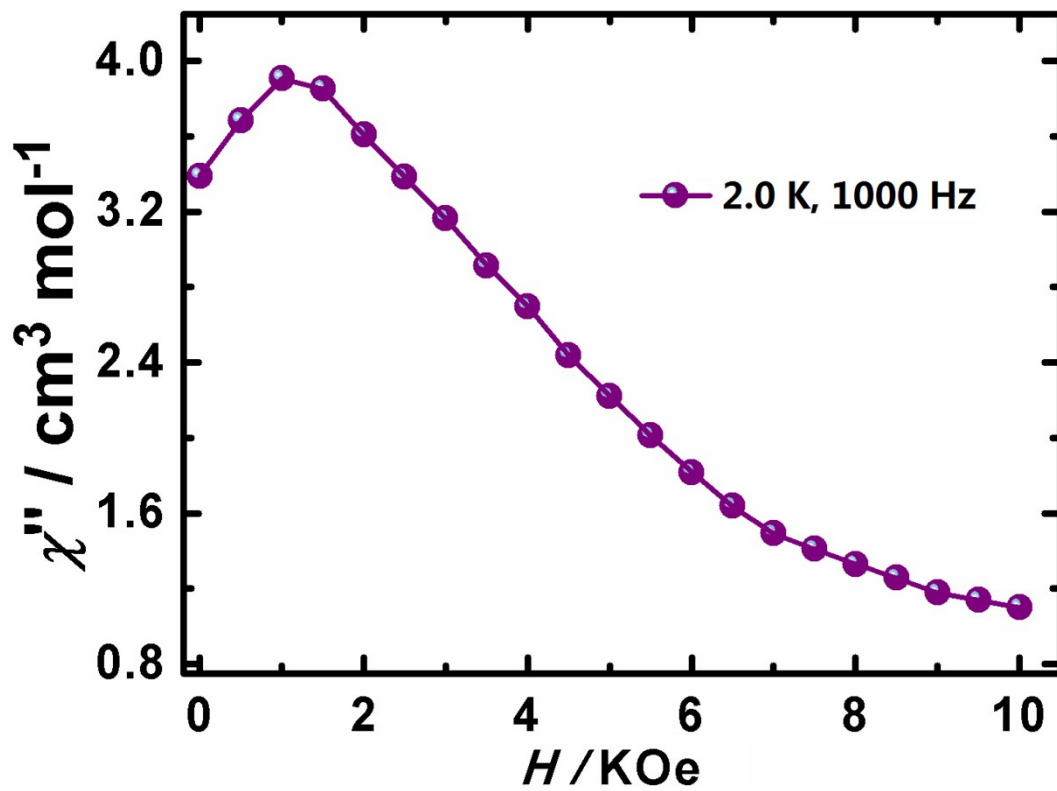

Figure S34 Field dependence of the  $\chi''$  product, ac susceptibility of 2 at 1000 Hz and 2 K.

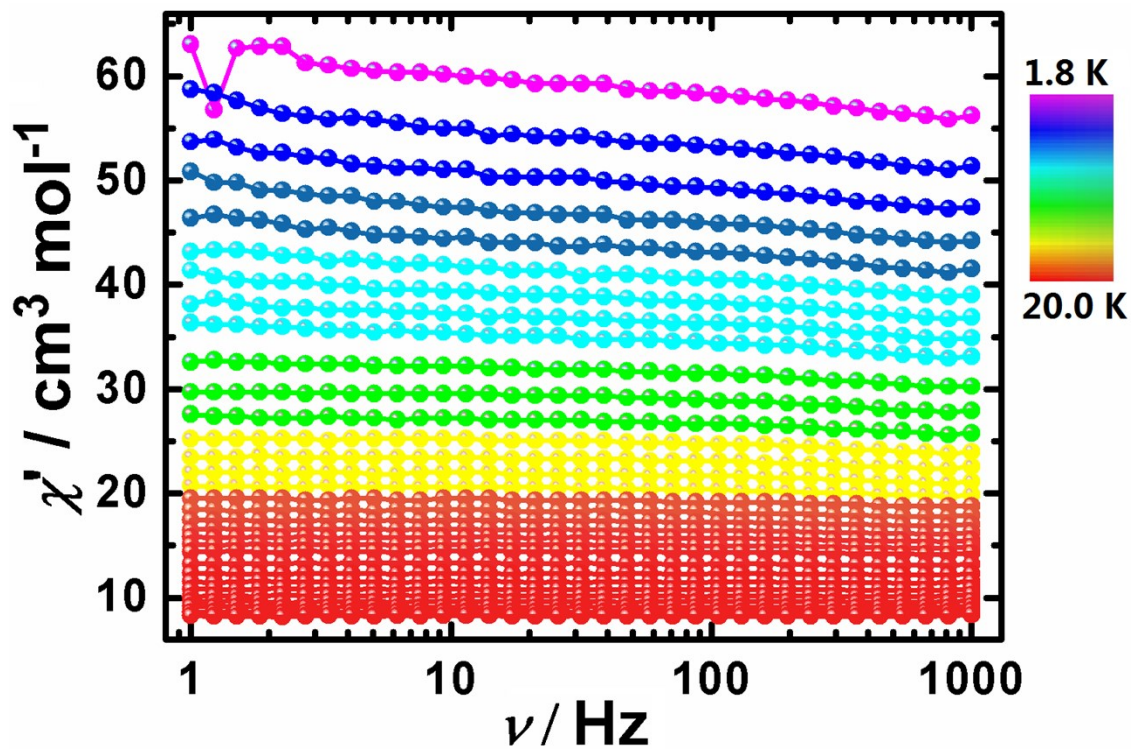

Figure S35 Frequency dependence of the  $\chi'$  product, *ac* susceptibilities under 1.0 kOe *dc* field for 2.

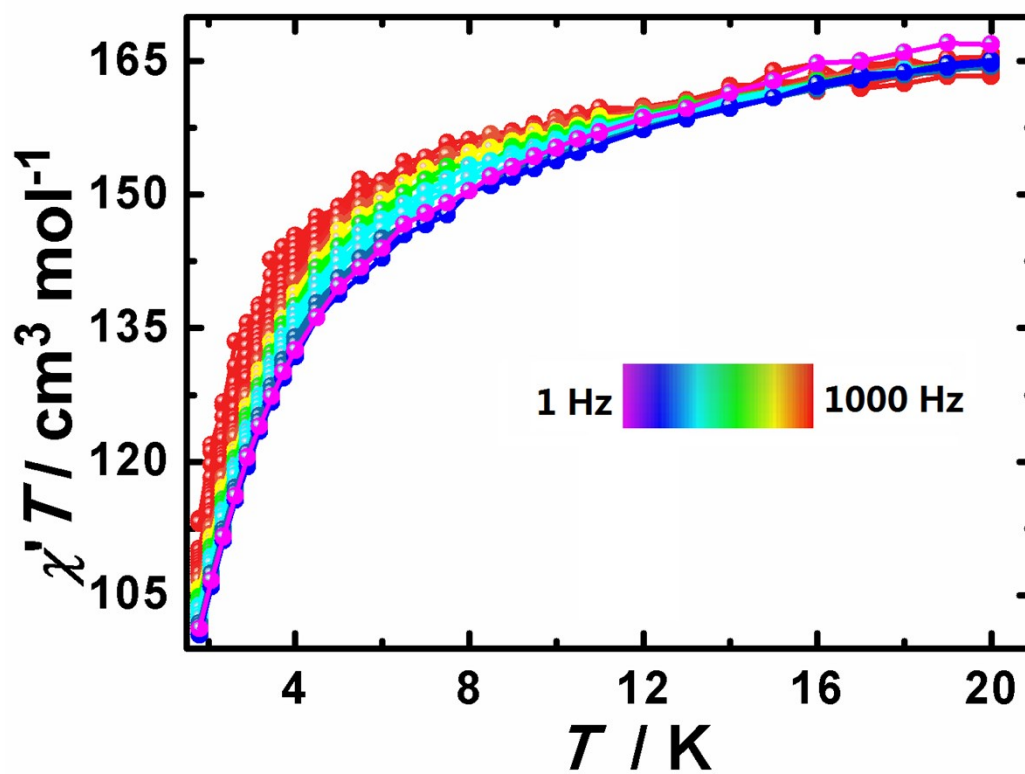

Figure S36 Frequency dependence of the  $\chi'T$  product, *ac* susceptibilities under 1.0 kOe *dc* field for 2.

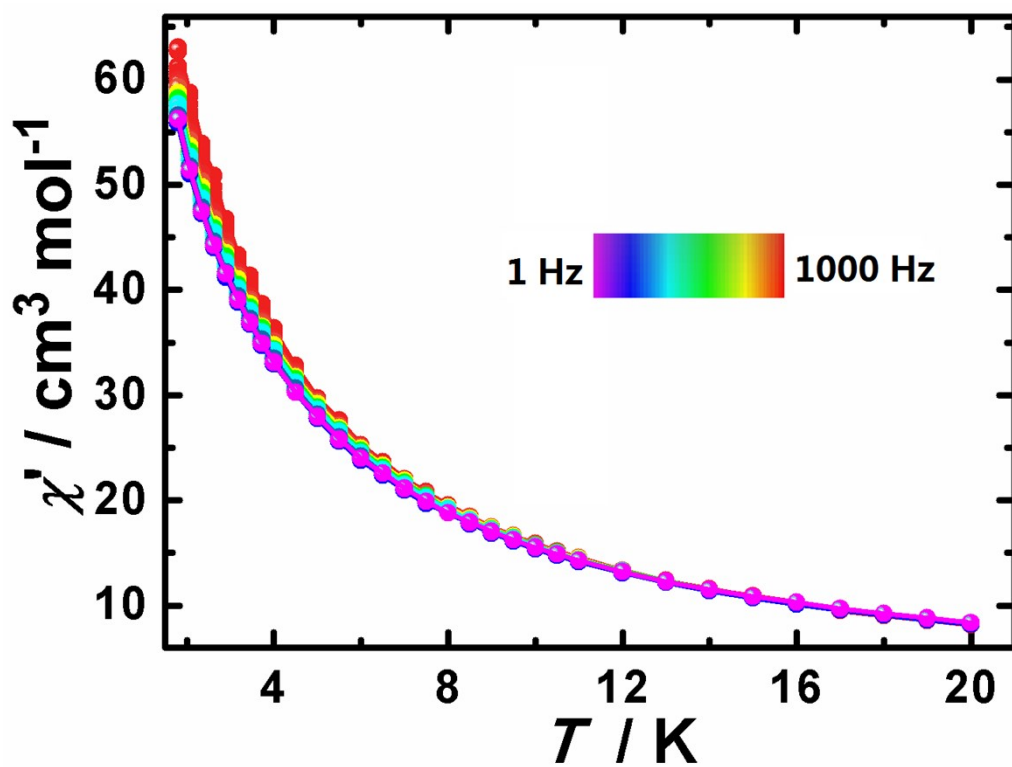

Figure S37 Temperature dependence of the  $\chi'$  product, *ac* susceptibilities under 1.0 kOe *dc* field for 2.

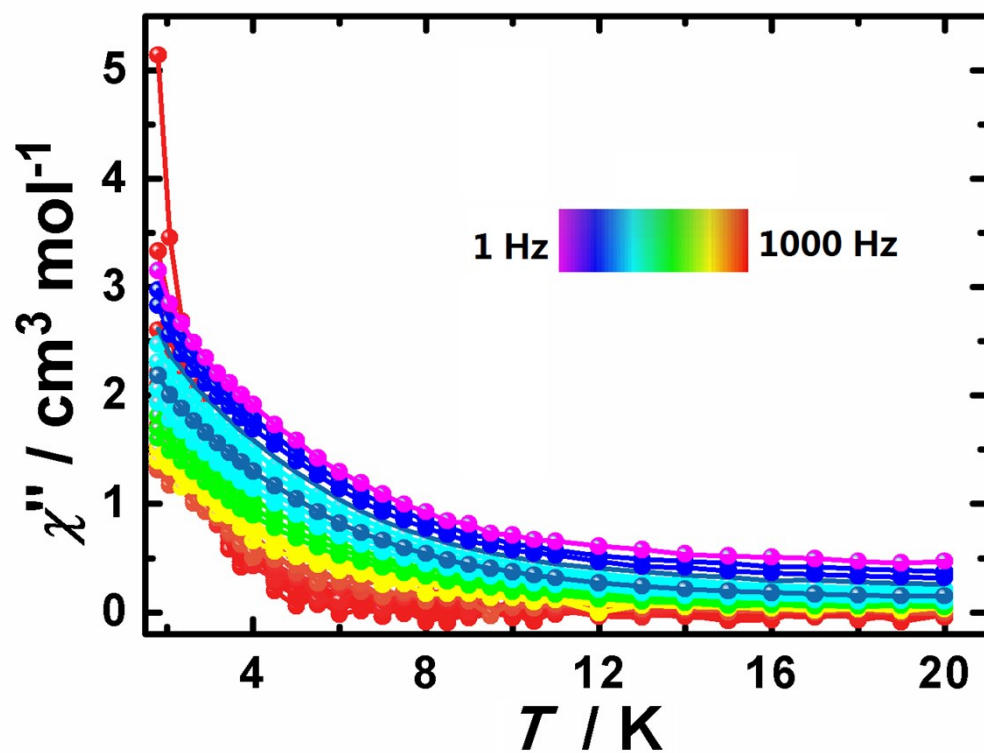

Figure S38 Temperature dependence of the  $\chi''$  product, *ac* susceptibility under 1.0 kOe *dc* field for 2.
